# Supplementary material for: A universal reading network and its modulation by writing system and reading ability in French and Chinese children
Source: eLife. 2020 Oct 29;9:e54591. doi: 10.7554/eLife.54591 (PMC7669264; doi:10.7554/eLife.54591)
Supplement: Figure 4—source data 1. [file elife-54591-fig4-data1.xlsx]

## Sheet: Feuil1
Language	dyslexia	FFG	IPL	IFG	ITG	pSTG	STS	MTG	SMG	PCG	SPL	MFG	R.IOG	R.FFG
1	1	0.808152	-0.0561863	0.701378	0.526557	0.681603	0.489213	0.702054	0.241346	0.890313	0.688287	1.54337	2.72414	1.8419
1	1	0.846903	-0.668828	-1.02162	-0.39494	0.446078	-0.0702576	0.783756	-0.0806179	0.0264317	-0.766834	0.56679	1.9183	0.075499
1	1	0.495071	0.302329	0.308903	0.646849	1.25164	0.174358	0.975654	-0.101866	0.403985	-0.048391	1.45268	2.71274	1.66976
1	1	0.683436	-0.0647039	0.184943	2.06684	-0.849276	0.371317	0.974312	-0.178891	0.573529	0.635836	0.379024	2.34161	1.43412
1	1	0.385506	0.903127	0.0573217	1.11844	0.274513	0.276386	0.319797	-0.494192	1.13022	1.06021	2.11129	2.1992	2.15871
1	1	0.048409	0.271261	0.0464572	0.294606	0.669918	-0.148284	0.38946	0.00843421	1.40124	1.60034	1.8726	0.919404	0.390958
1	1	0.257419	-0.232866	0.79654	1.5518	-0.0139819	-0.421364	0.327973	-0.262987	1.13425	0.988468	0.893777	2.35423	0.166448
1	1	0.80921	0.0578254	0.642294	0.323757	0.435631	0.304348	0.696653	0.00294695	1.02515	0.580464	0.388014	0.837729	0.636501
1	1	1.11963	0.734982	-0.493145	0.58864	0.197721	0.181321	0.180929	0.572667	1.34976	1.37445	1.99684	1.93918	0.984892
1	1	0.567465	-0.0436673	-0.152564	0.0817838	0.595008	0.300706	0.511467	-0.233368	1.31499	0.843318	0.818837	1.72487	1.31827
1	1	0.637612	-0.489578	-0.931217	1.39995	0.0178697	-0.223314	0.0591539	-0.297272	-0.11715	0.825831	-0.624392	1.23924	0.888737
1	1	0.348533	0.0187824	0.0698846	0.738165	0.78071	0.264068	0.00840628	0.312586	1.30497	1.18163	0.656224	3.69649	1.38571
1	1	1.57296	0.953111	0.868418	3.12108	1.16322	0.346858	-0.0376354	0.544656	2.10361	0.541572	1.97211	2.29946	1.05432
1	1	1.34369	-0.0436902	-0.469856	1.17446	0.131342	0.372828	0.729895	-0.222585	1.49039	0.918097	0.627324	2.49063	0.67092
1	1	0.994464	0.164443	0.418521	0.881865	1.08014	0.516794	0.807592	0.0430659	1.27019	-0.414847	0.871184	0.932275	0.438014
1	1	1.78454	1.23302	2.36608	0.256841	1.14122	0.818198	-0.169562	0.249287	2.67076	2.51598	1.24211	3.25143	0.493566
1	1	0.578906	-0.170166	0.427799	-1.51446	0.536623	0.72099	0.292617	-0.130767	0.736587	0.68094	1.28065	1.53874	0.574611
1	1	-0.0967254	0.309722	-0.132497	0.11082	0.834238	0.323173	1.03408	0.789802	1.16885	0.321753	0.0647538	1.79362	0.463557
1	1	-0.0107573	-0.362225	-0.649156	0.273847	-0.211623	0.355832	0.337161	-0.322845	0.584436	0.197349	0.634365	0.582972	0.124304
1	1	0.453	-0.0112545	0.356318	0.729027	0.544562	0.893754	1.69742	0.240062	1.01536	0.281176	0.570303	1.75043	0.384256
1	1	1.33051	0.490964	-0.0988059	1.96354	-0.504189	-0.112444	0.103264	-0.313513	0.19077	0.293766	0.348309	1.07103	1.90554
1	1	0.426402	0.324583	1.15926	0.622479	0.122261	0.0767981	0.239237	0.325446	0.886179	0.236892	0.845272	1.16542	1.04477
1	1	-0.0785627	-1.20411	0.386829	0.351305	-0.827226	-0.203936	-1.01046	-1.06174	0.362718	-1.20346	0.416105	1.08378	-0.318309
1	1	0.0158516	-0.164018	0.245049	-0.211021	-0.0658093	0.203209	-0.36041	-0.153436	0.557564	-0.168722	-0.3848	1.58606	0.239739
1	2	-0.0921533	-0.0842423	0.27345	0.872661	-0.10101	0.0968614	0.193737	0.0329684	0.589802	0.918555	0.366198	1.14086	0.42746
1	2	0.551794	0.0564163	0.030797	0.369186	0.0775858	0.334106	0.705219	0.146448	1.23825	1.21239	0.658909	1.80523	-0.0680727
1	2	1.22073	1.12261	-0.0269715	1.22233	0.117845	0.285405	0.871261	0.31533	0.929621	0.983161	1.0619	2.17038	1.33946
1	2	0.00739211	-0.590023	-0.339303	-0.358942	0.0605784	-0.374879	-0.760471	-0.297334	-0.630836	-0.773218	-0.0239749	0.9417	-0.493852
1	2	0.30283	0.252875	-0.220454	0.518995	0.585942	0.260965	0.946986	0.151649	0.764246	-0.103853	0.902577	1.37597	1.47318
1	2	0.203204	-0.166985	-0.838498	0.256235	-0.370804	-0.230368	-0.00719673	-0.143676	0.448563	-0.339519	-0.433371	0.782457	0.0523762
1	2	-0.825569	-0.0738906	-0.391784	1.46445	0.907809	-0.185616	-0.345523	-0.599349	-1.11136	0.324353	1.01096	2.10571	0.452996
1	2	0.0992623	-0.288066	0.0881129	1.52688	0.195586	-0.0228925	0.222267	0.0482275	0.691139	-0.0729923	-0.146581	2.44605	0.566841
1	2	0.608379	-0.236583	0.070258	0.517414	0.958504	-0.0521844	1.04318	-0.250287	1.92846	0.734148	0.635396	1.23292	0.255427
1	2	-0.122866	-0.00951346	-0.289229	0.197504	0.0233918	-0.197696	0.0903841	0.172768	-0.329938	0.111547	0.0210336	0.0808634	0.303276
1	2	0.428678	0.611	0.809346	0.708789	0.728023	0.160293	-0.237449	0.345105	0.552842	1.71651	1.45273	2.34266	1.11853
1	2	0.629108	0.185642	0.238853	0.113967	1.01448	0.225761	0.288641	-0.197957	1.89271	0.439536	1.47279	1.85726	0.336994
1	2	-0.694797	0.295347	-0.00763784	-0.187299	0.0174665	0.375238	0.411542	0.264814	0.225836	0.0753217	0.524283	0.581275	-0.376419
1	2	-0.268183	-0.156513	-0.0224548	0.294152	1.60206	-0.109006	0.011368	-0.101685	0.643469	0.610591	0.816034	1.93414	0.00518634
1	2	-0.226525	0.0873642	0.762317	0.534109	0.997388	0.0253698	1.13376	0.038881	0.543285	1.37517	0.978037	2.13531	0.51872
1	2	0.857359	0.0613559	-0.190783	-0.074265	0.327279	-0.0401456	-0.0623988	-0.0689125	1.21587	0.259808	0.597959	1.93239	1.40272
1	2	0.898815	0.0615884	-0.684605	1.44441	0.00948515	0.1328	0.533415	-0.0369412	1.82079	0.527039	0.954123	1.45457	1.16993
1	2	-0.117277	-0.412327	0.0745831	0.259024	-0.0154183	-0.03158	0.0511491	-0.418863	0.3575	0.721459	0.387999	1.31643	1.10698
1	2	-0.00783937	0.189624	-0.478795	0.536603	1.26526	-0.427558	0.723939	-0.415071	0.544426	-0.581285	0.196631	0.985913	-2.08499
1	2	-0.488971	-0.858975	0.724746	0.918026	0.411111	0.63288	0.429563	-0.405832	0.17713	-1.20509	0.269229	1.64498	0.92918
1	2	0.500099	-0.544042	-0.132882	0.646577	0.221043	-0.189296	-0.0253689	-0.283929	0.451725	-0.386223	0.442909	0.564185	0.817328
1	2	0.649345	-0.018912	0.33665	0.024927	0.278174	0.0106217	-0.171242	-0.0534609	0.683324	1.08346	0.708943	1.66361	1.62716
1	2	-0.12403	-0.218048	-0.163045	0.891328	0.310687	0.298932	0.432086	0.142991	0.360459	-0.24658	0.471028	0.985981	0.459858
1	2	0.922907	-0.409711	0.294304	0.806838	0.47747	-0.376224	0.461311	-0.141365	0.22222	-0.121417	0.225377	2.80967	0.679807
2	1	0.104824	-0.778715	-0.421707	0.486129	0.15072	-0.316401	-0.128676	-0.285672	0.170445	-0.146537	-0.0493143	0.989838	0.15091
2	1	0.635063	-0.190344	0.193097	0.470962	0.26277	0.144035	0.073677	0.0988294	-0.0988198	0.126867	0.683996	2.09197	2.13123
2	1	0.425995	0.309088	1.1929	2.28395	-0.0642529	0.467502	1.15703	0.60661	0.585318	0.927937	1.47617	1.92475	0.376174
2	1	1.31307	-0.0335945	-0.0494182	1.02993	-0.0282133	0.516969	0.673224	-0.2233	0.758728	0.0371544	0.726552	2.38353	2.42775
2	1	-0.0945007	-0.0448088	0.237528	-0.0132417	0.273822	0.0227068	0.0177424	-0.170021	0.0959163	-0.185573	-0.334134	1.06188	1.1426
2	1	0.548356	0.0895801	-0.133697	0.381903	-0.0881766	-0.394095	0.252986	0.456578	-0.021568	-0.229602	0.136337	1.59837	1.1327
2	1	0.763383	-0.132672	0.215181	-0.0627332	-0.0154379	0.13343	-0.240876	-0.0202289	0.332929	-0.322858	0.508543	1.26159	1.13632
2	1	0.912757	-0.060963	0.464937	-0.511337	0.45172	0.676202	1.05752	0.0532716	0.935481	0.589483	1.30077	1.41381	1.24676
2	1	1.25146	-0.133883	0.323524	0.36716	0.30405	0.585774	2.15473	-0.122352	0.667584	-0.177655	0.823563	2.32073	1.56958
2	1	1.64407	0.425113	-0.643253	0.950704	0.0283562	0.34113	0.503967	0.449248	0.842639	0.286425	0.222683	1.42378	2.26734
2	1	0.124972	0.378165	-0.0751331	0.342759	0.257324	0.310139	0.0163303	0.111495	0.769496	0.138545	0.0737646	0.765231	0.704343
2	1	0.990814	0.894964	1.14504	1.58877	0.83067	0.948161	1.72142	1.05584	2.53831	0.416628	1.24911	2.49639	1.61774
2	1	0.860549	0.0487642	-0.0501278	0.562806	0.00765942	-0.0852819	-0.0145781	0.0407128	0.160792	0.361168	0.335803	1.18939	1.07805
2	1	0.303925	-0.172718	-0.025456	0.154254	0.0420716	0.00172322	0.0653708	-0.0281591	0.397696	-0.153553	0.385789	1.39674	0.209557
2	1	0.165919	0.204525	0.107868	0.445331	0.153249	0.0512406	0.291786	0.112407	0.559224	0.183483	0.292833	1.09582	0.0717547
2	1	0.0539138	-0.219918	0.482879	0.664826	0.502881	0.17229	0.000415985	-0.29965	0.726035	0.0259334	0.302874	1.9277	1.15914
2	1	1.92038	1.18616	1.51765	2.64605	0.375269	0.64735	0.909855	0.809618	1.46501	0.792879	0.781404	2.7132	-0.0168054
2	1	0.277352	-0.0743607	0.0435087	1.55842	0.559198	0.0281221	0.162221	0.767204	1.54931	-0.125869	0.132003	1.07216	1.13014
2	1	0.602761	-0.183054	0.235235	-0.295333	0.443694	0.031356	0.103979	0.180513	0.118643	0.239422	0.126132	1.5443	1.37357
2	1	1.41368	-0.0241901	0.0224289	0.446389	0.0537446	0.130461	-0.0430799	0.1267	-0.337079	-0.0276549	-0.0639962	1.64956	2.11841
2	1	0.479473	0.267313	-0.00807328	0.997925	0.149376	-0.0280106	0.24941	0.079865	0.867992	0.445075	0.194302	0.531748	0.374121
2	1	0.0380457	0.0434576	0.133589	0.416266	0.164325	-0.0590927	-0.387775	-0.0330154	0.795157	-0.479328	0.411689	1.42196	0.884608
2	1	1.12814	-0.0585446	0.112369	1.44459	0.25359	0.0869353	0.701497	0.0373255	1.00765	0.919808	1.788	1.17598	0.788688
2	1	0.781986	-0.306712	0.165013	-0.311388	0.650732	0.532117	0.280818	-0.610321	1.12659	-0.208851	0.212982	3.18356	1.00291
2	2	-0.153846	0.0475046	0.139715	-0.294352	-0.182934	-0.15891	-0.167705	0.0949132	-0.0723456	-0.536019	0.00780267	1.77115	2.2425
2	2	0.256304	-0.131505	0.0527782	1.27438	0.256207	0.112023	0.0853801	0.0521346	0.00243536	-0.382933	-0.259799	1.42249	1.55033
2	2	0.0513546	-0.287246	-0.0964248	-0.214652	-0.051184	-0.141116	-0.225321	-0.489613	-0.0308798	-0.642234	0.243699	0.838482	0.446457
2	2	-0.239827	0.132088	0.0478466	0.107231	-0.147691	0.0420318	-0.0470835	-0.0585023	-0.117242	0.159201	-0.139944	0.402096	0.160171
2	2	0.517435	0.251017	0.170939	0.487989	-0.147611	0.115524	-0.361055	0.0916436	1.10133	0.463499	0.446779	1.5561	2.01841
2	2	0.13913	0.212406	0.882861	1.25966	0.719414	-0.0776468	-0.0312745	0.564358	1.05099	-0.173805	-0.0201874	2.44532	1.30797
2	2	0.28965	-0.0183753	0.153154	0.323545	-0.255544	-0.123717	-0.145097	-0.0389577	0.793609	-0.228962	-0.0736344	0.81446	1.11677
2	2	-0.512162	-0.202026	0.117178	-0.0264104	0.0352199	-0.0480976	-0.0395075	-0.314095	-0.379581	-0.350096	-0.315229	0.739396	0.556513
2	2	-0.226852	0.071988	0.129045	0.77263	-0.087219	0.00976806	-0.203567	-0.0479552	0.017443	-0.204575	-0.189148	1.1551	0.45059
2	2	1.68565	0.154682	0.9015	0.477961	0.201087	0.22479	0.191868	0.399251	1.09763	0.155684	0.6801	2.61821	1.28037
2	2	0.405999	0.200288	-0.288587	0.538446	-0.25682	0.150999	-0.0188099	0.079966	-0.0619581	0.0922031	-0.366597	0.79549	0.948649
2	2	0.349877	0.0928214	0.0550013	0.389562	0.260311	0.427865	0.377979	0.0995365	0.338842	0.515438	-0.0814105	1.24599	0.769717
2	2	0.316365	-0.186557	-0.0993908	-0.0553234	-0.204188	-0.110686	-0.0582787	-0.284665	0.0651957	0.209402	0.185772	0.992973	0.59313
2	2	-0.0937415	0.23308	0.320392	-0.212344	0.246431	0.15222	0.518486	0.0480611	0.372831	0.102032	0.39002	1.40765	0.659031
2	2	-0.321885	-0.082678	0.432854	0.239733	-0.173805	0.0502348	0.00533178	-0.0361207	0.325918	0.18925	0.0772532	1.82839	1.24888
2	2	0.381445	-0.0315733	0.20101	0.671429	0.208513	0.0585738	0.62727	-0.159526	0.48156	0.0359563	0.378258	1.79696	0.870937
2	2	0.0705967	-0.266011	0.26063	-0.184253	-0.312452	-0.219386	-0.315689	-0.14308	0.456485	-0.339723	-0.0460913	0.562141	1.28867
2	2	0.30138	-0.336642	0.143004	-0.0253816	0.263876	0.0349	0.214472	0.0787753	-0.0523282	-0.188049	0.157795	1.13982	0.920291
2	2	0.278844	0.520115	0.214257	-0.349787	0.0526334	-0.117418	0.420686	0.386397	0.427255	0.383806	0.215424	0.790193	0.302007
2	2	0.346237	0.420761	0.985805	0.167399	0.127852	0.0586311	0.705382	0.507771	1.26137	-0.156733	0.737445	2.66671	0.584014
2	2	-0.0711072	0.00697831	-0.408264	-0.175665	0.163227	0.0654937	0.0518841	-0.05494	0.0389301	0.043802	0.108865	0.98222	0.61047
2	2	0.428525	0.17114	0.30732	0.945436	0.0820581	0.219113	-0.132774	-0.015539	0.584317	0.769371	0.262231	1.66059	1.08279
2	2	-0.128314	-0.00378325	-0.0311328	0.467835	-0.10551	0.0635056	0.196265	-0.0157927	0.450971	0.24757	-0.116503	0.371936	0.914914
2	2	0.136089	0.039396	0.375751	0.693999	-0.1598	0.0319867	0.421887	0.0918029	0.446108	0.336102	0.0272902	0.936733	0.971159
