# Supplementary material for: A universal reading network and its modulation by writing system and reading ability in French and Chinese children
Source: eLife. 2020 Oct 29;9:e54591. doi: 10.7554/eLife.54591 (PMC7669264; doi:10.7554/eLife.54591)
Supplement: Figure 5—source data 1. [file elife-54591-fig5-data1.xlsx]

## Sheet: Feuil1
Language	dyslexia	withinVWFA	withinMFG	withinPCG	withinSTS	withinIPL	withinPsts	betweenVWFA	betweenMFG	betweenPCG	betweenSTS	betweenIPL	betweenPsts
1	1	0.404004	0.291838	0.165222	0.8632	0.525826	0.616019	0.439251	0.43069	0.311839	0.186465	0.398299	0.185631
1	1	0.116261	0.393316	-0.121682	0.155171	-0.0440543	0.319818	-0.002058	-0.171207	0.00255244	-0.127203	0.244892	-0.067671
1	1	0.714738	0.916813	0.0802889	0.0435642	0.801812	0.615827	0.0848775	0.193212	0.0726825	0.129985	0.504542	0.409933
1	1	0.926869	0.275677	0.805692	0.628607	0.393761	0.49637	0.257135	0.134586	0.39429	-0.277202	0.458871	-0.0959063
1	1	-0.176159	0.654806	0.310651	0.640071	0.0142087	0.753318	0.198811	0.381624	0.234969	0.398596	0.623133	0.495791
1	1	0.466629	1.07365	0.713409	0.520232	1.4698	0.841151	0.510593	0.534414	0.301374	0.260833	0.569011	0.307206
1	1	0.609743	0.811827	0.101625	0.0705189	0.140767	0.353796	0.733371	0.791801	0.25474	0.230563	0.574722	0.111593
1	1	-0.177055	0.0730325	0.258638	-0.701739	-0.236946	0.348032	-0.11552	-0.0686516	-0.0980706	-0.395947	-0.240155	-0.0457724
1	1	0.96675	1.07715	0.35027	0.399535	-0.279952	0.379035	0.247488	0.532566	0.101319	0.109822	0.162162	-0.221863
1	1	-0.0212046	0.396729	0.551632	0.34	0.320384	0.696351	-0.00923109	-0.211609	0.314316	-0.280373	-0.186601	0.193593
1	1	0.37687	-0.390144	-0.502785	-0.706533	0.317691	-0.260333	0.444586	-0.184304	0.0233697	-0.164702	0.410522	0.150296
1	1	0.90549	0.770476	0.851672	0.738173	0.768061	0.979042	0.29769	0.107726	0.314095	0.121747	0.188631	-0.0215599
1	1	1.22163	0.853879	0.775331	0.960476	0.459257	1.33938	0.453267	0.0097635	0.193337	0.0169109	-0.0776216	0.577323
1	1	0.661105	0.390614	0.744649	0.13731	0.821706	0.223945	0.598092	-0.132315	0.32374	-0.135583	0.567049	0.132766
1	1	0.685289	0.248217	0.311138	0.27498	0.699553	0.620274	0.307378	0.287787	0.149089	-0.0955185	0.338261	0.20051
1	1	0.532579	0.306859	0.829868	0.382783	1.21454	0.976459	-0.090583	-0.407346	0.069798	-0.138624	0.344448	-0.340968
1	1	0.907014	0.779758	0.301788	1.01649	0.69856	1.3472	0.60266	-0.0498615	-0.106695	-0.0628516	-0.195598	0.628128
1	1	0.299961	0.238105	0.479835	0.682256	0.19044	0.758307	0.0981195	0.0763288	-0.304278	0.132079	0.0645858	-0.387214
1	1	-0.157025	0.307755	-0.0794688	-0.0114695	0.410325	-0.178767	-0.184138	-0.262954	0.00514766	-0.446272	0.00897273	-0.151493
1	1	0.92933	0.243587	0.646718	0.96976	0.946329	1.04589	0.532277	-0.166898	0.236679	-0.111992	0.247072	0.388243
1	1	0.848699	0.413667	-0.202617	0.378264	0.303431	0.066687	0.728531	0.525544	0.205232	0.374694	1.0392	0.39099
1	1	0.499997	0.449649	0.164485	0.774556	0.494363	0.773804	-0.06737	-0.0937406	0.10091	-0.111522	0.119789	0.106384
1	1	0.664181	0.681277	0.348827	0.295396	0.354627	0.160855	0.179038	-0.0100697	0.248198	-0.0546294	0.358663	0.176023
1	1	0.0620072	0.0390078	0.257857	-0.112674	0.462055	-0.252604	-0.201525	0.215602	0.0437099	-0.0855943	0.446572	0.011987
1	2	0.672834	0.511556	-0.109046	-0.115693	0.0528868	-0.270918	-0.0654136	-0.27953	-0.238302	0.15123	0.305746	0.0611622
1	2	0.735425	0.268608	0.383853	0.633638	0.641428	0.692507	0.0317288	0.0318949	0.137321	-0.0265714	-0.0229294	0.116316
1	2	0.290123	-0.166102	0.578094	0.393673	0.253822	0.270618	0.260186	-0.56875	0.0357852	-0.14555	-0.0626124	-0.104784
1	2	0.43515	0.110042	0.151762	0.461125	0.0162868	0.056741	0.439238	0.110431	0.231482	0.144613	0.140486	0.00833461
1	2	0.305146	0.574532	0.459649	0.231117	0.581461	0.259646	0.0446854	0.211014	0.18832	0.0565982	0.0558358	0.274266
1	2	0.295203	-0.0773866	0.0524506	0.32174	0.103214	-0.0199557	0.0479833	-0.207982	0.220169	-0.349238	-0.0533779	-0.0819152
1	2	0.513123	0.426571	0.6786	0.237835	0.502631	1.00063	0.354514	0.123802	0.353653	0.0236185	0.502083	0.477998
1	2	0.0241538	0.10032	0.211117	0.496947	0.80977	0.584424	0.619231	0.173504	0.247508	0.152159	0.338468	0.193312
1	2	0.273063	0.881504	1.19103	0.19044	0.816696	0.706131	0.0753458	0.567484	-0.105647	0.165835	0.518043	-0.124325
1	2	-0.128591	-0.186491	-0.111083	-0.522564	-0.103901	-7.68265e-05	0.00570669	0.096364	0.028498	0.0520159	-0.142349	-0.124765
1	2	0.237941	0.0481935	0.61832	0.404943	0.225558	0.505785	0.234994	-0.141349	0.106038	-0.0880041	0.02097	0.168062
1	2	0.44041	-0.342747	0.793979	0.21491	0.0491699	0.14788	0.0553945	-0.0567285	-0.122062	0.0966511	0.480312	0.297769
1	2	0.217464	-0.0257602	0.0748099	0.273336	-0.296076	-0.343503	0.114372	-0.210916	-0.184015	-0.137737	0.31172	0.162291
1	2	0.573908	0.725854	0.501639	0.300492	0.332012	1.1655	0.350943	-0.0548951	-0.00316205	0.0225187	0.00312138	-0.0990637
1	2	0.229014	0.40062	0.652188	0.100189	0.780023	0.691127	0.082158	-0.0863392	-0.148587	-0.000197171	0.58337	-0.210451
1	2	0.0773803	-0.0131764	-0.105228	-0.172912	0.270074	0.0040304	-0.0218974	-0.373578	-0.31965	-0.313434	-0.256812	-0.227064
1	2	0.0878024	0.201694	0.53968	0.397741	0.844207	0.232197	0.0740882	-0.178236	-0.00644765	-0.250562	0.258277	0.240397
1	2	0.295532	-0.166142	0.281122	0.103258	0.723151	-0.0451439	0.29466	0.120009	0.216879	-0.247773	0.763796	0.332732
1	2	0.137102	0.509994	0.260215	0.597693	0.564315	-0.251531	0.497377	0.190968	0.131836	-0.0288069	0.316478	0.108729
1	2	-0.0460237	0.482508	0.133015	0.1032	0.371104	0.105705	0.46048	0.123897	0.145988	0.196169	0.203594	0.462619
1	2	0.099438	0.293417	0.0505636	0.486602	0.40367	-0.0791568	0.111495	-0.256303	-0.0972127	0.0262957	-0.190963	-0.189648
1	2	0.309718	0.0349511	-0.0241782	0.19681	0.706331	0.44293	0.197312	0.114051	0.191534	-0.0189552	0.407902	0.125839
1	2	0.306367	-0.0331873	0.350219	0.398675	0.882349	-0.012305	-0.133946	-0.129374	0.169027	0.233573	-0.460212	0.0420076
1	2	0.221173	-0.027578	0.169605	0.020198	0.181186	0.293918	0.0867725	-0.142108	-0.0814977	0.0199595	0.158176	-0.208892
2	1	-0.112328	0.351812	0.389426	0.0161607	-0.217722	-0.0119115	0.253484	-0.134239	-0.144243	0.518771	0.243792	-0.0342284
2	1	0.415326	0.448391	-0.171838	0.610718	0.690278	0.306495	0.188424	0.214225	0.0292169	-0.0713161	0.046224	0.0478127
2	1	0.840458	0.224261	0.521241	0.705164	0.969204	0.789947	0.0754726	0.0830707	0.0732166	-0.0720659	0.390236	0.269261
2	1	-0.299815	0.281632	-0.377593	0.64833	0.330577	0.11922	0.294169	0.133483	-0.0978247	0.185052	0.345263	0.00502331
2	1	0.258994	0.32917	0.143611	0.567177	0.0725894	0.0996086	-0.0763322	0.079755	0.156928	0.20043	0.0529658	-0.0916147
2	1	0.55242	0.208609	0.37167	0.396048	0.462693	0.49329	0.356802	0.411777	0.280386	0.287722	0.316275	0.512002
2	1	0.652666	0.805461	0.844277	0.886903	0.5538	0.902495	0.24328	0.540175	0.715682	0.326037	0.249517	0.454068
2	1	0.710344	0.486456	0.314997	0.617601	0.0174079	0.276391	0.644457	0.447652	0.382923	0.115921	-0.0407325	-0.138513
2	1	0.197101	-0.159077	0.354777	0.0792223	-0.264343	0.206697	0.16535	0.155587	0.300449	0.178061	-0.169163	-0.157671
2	1	0.678026	0.609617	0.249894	0.052427	0.870336	0.545099	0.396295	0.0540061	-0.287187	0.159628	0.32438	-0.354015
2	1	0.110998	0.282639	0.282329	-0.498529	0.593546	0.0205865	-0.0477928	-0.269289	0.151806	0.058461	0.4756	0.176384
2	1	0.335897	0.101999	0.356666	-0.054162	0.641238	0.304112	-0.0976696	-0.0383498	0.0718968	-0.0587537	0.290674	-0.0269837
2	1	1.37959	0.559309	0.948633	0.755834	0.642304	0.279865	0.297379	-0.192354	-0.409183	0.0462657	-0.341547	-0.221001
2	1	0.787121	-0.122298	1.02178	0.368549	0.46573	0.621043	0.320617	-0.0470359	0.45223	0.0711997	0.221365	0.471662
2	1	1.32657	-0.116264	0.264649	0.783202	0.571433	1.10295	0.47046	0.0853255	0.187504	0.0843781	0.223397	0.550989
2	1	0.668983	0.681657	0.51826	0.24038	0.549897	-0.041095	0.252584	-0.0516459	0.136606	-0.214458	0.0996499	-0.180382
2	1	0.422408	-0.140762	1.06193	-0.106054	0.987855	-0.00637007	-0.0249561	0.096315	0.10156	-0.00145029	0.0546794	-0.216125
2	1	0.666331	0.357284	0.71531	0.275052	0.475422	0.704313	-0.0147816	-0.0882459	0.151747	-0.0679149	0.224501	-0.0593212
2	2	0.164207	0.16584	0.355801	0.120331	0.268695	-0.496227	0.252277	0.203684	0.130636	0.0597652	0.513546	-0.211137
2	2	0.34693	0.443722	1.19083	0.100926	0.0283137	0.851973	0.101967	-0.0280499	0.221662	0.152845	0.428499	0.614383
2	2	0.0883771	0.312907	0.0346058	0.0425513	0.131244	0.144404	-0.298263	-0.210825	0.0532305	0.045464	-0.155665	0.153133
2	2	-0.198652	0.156054	0.302346	0.178567	-0.251753	-0.0463996	0.0415846	0.12602	-0.138886	-0.0445554	0.0652419	0.0281421
2	2	0.0511991	0.263769	0.666184	-0.234759	0.482449	0.141188	0.167022	0.036952	0.0164893	-0.129528	-0.258676	0.167909
2	2	0.740672	0.169085	0.868399	0.171744	0.456648	-0.48787	0.420787	0.140461	0.865244	0.10271	0.326809	-0.0462884
2	2	-0.199515	0.124427	-0.261483	0.430763	-0.69411	0.508583	-0.102411	-0.417614	-0.139323	0.0379042	-0.0523343	0.0964018
2	2	0.956969	0.150531	-0.0490278	0.307297	1.14915	0.296987	0.641968	0.000302654	0.350473	0.00193151	0.483958	0.393024
2	2	-0.129466	-0.0962879	-0.140426	-0.060003	0.217868	-0.504361	-0.00802746	-0.181167	-0.0778294	0.0861793	0.0259329	0.107081
2	2	0.064799	-0.214918	0.111032	-0.0796134	0.514496	0.00695134	0.078275	-0.137256	0.228463	0.0739095	0.3566	-0.0621747
2	2	0.306201	0.408694	0.224909	0.290638	0.753714	0.167984	0.200388	0.0067913	0.123178	0.168492	0.24321	0.103963
2	2	0.180141	-0.0843535	-0.382325	0.0326294	0.218359	-0.0843632	0.263615	0.260925	0.379919	0.0589763	0.245968	0.178116
2	2	0.668231	-0.167997	0.16429	0.0649407	0.793902	0.00515464	0.476302	0.202593	0.463112	-0.468339	0.461178	0.418262
2	2	0.938405	0.379512	0.622526	0.392415	0.0963913	0.225341	0.573662	-0.153894	-0.462287	0.157012	0.143117	0.390117
2	2	0.322016	0.287875	0.291903	-0.0330797	-0.199591	0.0856224	0.488556	0.0790651	0.0299439	-0.0119697	-0.0434433	-0.0186053
2	2	0.00382851	-0.185546	-0.151165	-0.153894	0.434078	0.426389	-0.0740294	-0.139394	-0.351486	-0.188339	0.12388	0.153358
2	2	0.553964	0.11433	0.240979	0.335641	0.240478	0.452556	0.0167422	0.136183	0.117738	0.329362	0.0485933	0.557698
2	2	-0.0319303	-0.0277352	0.0706858	-0.0742255	0.159478	0.0605488	0.116528	-0.0521257	0.207443	-0.20271	-0.0319995	-0.0262349
2	2	0.476969	0.0313758	0.228413	0.220654	0.470406	0.25354	0.451932	0.0197876	0.183912	0.00459503	0.428925	0.242842
2	2	0.100077	-0.417316	0.463433	-0.606453	0.429633	-0.321864	0.377129	0.183493	0.147563	0.104526	0.150561	0.517605
2	2	-0.138445	0.240493	0.148041	-0.537095	0.0447096	-0.0353999	0.0635834	0.0923619	0.186453	-0.0253291	0.337044	0.113095
