# Supplementary material for: A universal reading network and its modulation by writing system and reading ability in French and Chinese children
Source: eLife. 2020 Oct 29;9:e54591. doi: 10.7554/eLife.54591 (PMC7669264; doi:10.7554/eLife.54591)
Supplement: Figure 6—source data 1. [file elife-54591-fig6-data1.xlsx]

## Sheet: Words
language	dyslexia	-48-73-16	-48-64-16	-48-55-16	-48-46-16	-48-37-16	-48-28-16	-39-73-16	-39-64-16	-39-55-16	-39-46-16	-39-37-16	-39-28-16	-30-73-16	-30-64-16	-30-55-16	-30-46-16	-30-37-16	-30-28-16	48-73-16	48-64-16	48-55-16	48-46-16	48-37-16	48-28-16	39-73-16	39-64-16	39-55-16	39-46-16	39-37-16	39-28-16	30-73-16	30-64-16	30-55-16	30-46-16	30-37-16	30-28-16
1	1	1.95723	1.68846	0.654144	0.620653	0.0891168	0.20674	2.39505	1.72623	1.8368	1.68113	0.457604	0.155139	0.900512	1.60573	2.05448	0.906971	0.70935	0.422545	2.77008	2.51643	1.22285	1.10189	0.622984	0.0908399	3.01153	2.03891	1.7317	1.07667	0.881917	0.194613	1.46064	1.20205	1.05204	0.801143	0.600594	0.372269
1	1	1.10969	1.22415	0.268773	0.0685784	-0.0652648	-0.0915771	1.44921	0.970326	0.750296	0.682012	0.000867423	-0.200131	0.0736357	-0.295545	-0.63698	-0.892806	-0.886829	-0.457002	1.9953	1.83822	1.07599	0.00815429	-0.135525	-0.163587	2.47725	0.756495	0.068113	-0.23875	-0.00530933	-0.194041	0.0183565	-0.505825	0.0212196	-0.328616	-0.922149	-0.373206
1	1	1.67409	1.84051	1.18562	0.219947	-0.0254584	-0.21332	1.71956	2.01139	1.36435	1.31005	0.295233	-0.249186	1.57596	1.52732	0.429873	0.0412927	-0.499175	-0.480808	2.98737	3.18284	2.20091	1.62863	0.323197	-0.384585	3.0745	2.73742	1.74914	1.24754	0.188771	-0.29921	2.62447	1.51852	0.584759	0.150314	-0.438737	-0.42074
1	1	3.17877	3.083	1.50185	0.506257	-0.0456963	-0.0766094	2.52328	2.22644	1.72776	0.549889	-0.213076	0.0291629	2.32044	0.663649	0.27741	0.0315222	-0.519955	-0.313954	2.23017	2.66039	2.39497	1.32348	0.12396	0.00675638	2.59296	1.96186	1.70002	1.39706	-0.137341	-0.207495	1.60189	0.636795	0.879366	-0.0384216	-0.4451	-0.35903
1	1	1.00812	1.64447	1.67785	0.165021	-0.00127485	0.0431465	2.98149	1.95247	1.63859	1.30073	0.31312	0.176115	1.39052	1.04339	0.876393	0.199381	-0.597048	-0.31261	3.5869	2.79879	1.1367	0.618914	0.277876	0.114309	2.61263	2.26824	2.12739	2.27403	0.416615	0.260136	2.46692	2.52698	1.37073	0.0504476	-0.472642	-0.133562
1	1	1.33327	1.62715	0.797398	0.111352	-0.220278	-0.0172309	0.594652	1.0355	1.1228	0.336248	-0.1058	-0.261822	-0.234709	0.18771	0.0247535	-0.371494	-0.479596	-0.0167348	0.16694	1.52959	1.44549	0.39381	-0.0362372	-0.333825	1.56584	0.543997	0.489587	0.0682846	-0.0625441	-0.00195597	3.73819	0.40178	0.0775957	-0.467056	-0.388373	-0.157161
1	1	2.39092	1.99613	0.674721	0.344049	-0.0936028	-0.0503205	2.98643	2.56613	1.00963	-0.0882311	-0.226687	-0.0791702	3.19957	1.81328	1.20444	-0.0194	-0.614119	-0.0309494	1.04099	1.18656	1.58163	0.0550117	-0.151467	-0.242895	2.01663	0.602357	0.232195	0.213836	0.0333298	-0.33586	2.65641	0.662195	0.279967	-0.0127695	-0.862411	-0.380255
1	1	0.0402856	-0.218773	0.504502	0.469555	-0.0525893	0.0669838	0.364828	0.157363	0.885331	0.771699	0.472298	0.0529409	0.220455	0.419982	0.599349	0.597623	0.321564	0.0324551	0.691786	0.747597	0.848086	0.469333	0.193161	0.0968749	0.47395	0.820732	0.648561	0.466162	0.49314	0.404594	0.237746	0.13342	-0.457696	0.366078	0.31498	0.215386
1	1	1.76468	1.1415	2.5689	1.17347	0.148088	-0.140818	1.69618	0.70898	0.697536	0.13143	-0.00892401	-0.115179	1.89572	-0.532273	-0.855707	-1.85676	-0.644082	-0.209694	2.48784	2.88887	1.08031	0.00253375	-0.168948	0.207706	3.48115	2.37154	1.1321	0.209277	-0.326053	-0.571059	1.41721	-0.162442	0.228417	0.045937	-0.512773	-0.300432
1	1	1.13375	0.744923	0.246401	0.200749	0.0381243	0.100244	1.84219	1.31968	1.28833	0.812045	1.01082	0.288005	1.17924	1.17742	0.279217	0.0691159	-0.0113216	0.0953867	3.33882	2.92359	2.69655	1.33829	0.490467	0.0762903	4.19498	2.20257	1.35916	0.764302	0.394312	0.290962	1.2616	0.938149	1.17916	-0.342588	-0.103696	0.199837
1	1	1.94602	2.54038	1.35565	0.523544	0.422367	0.354463	2.8023	1.83617	2.07602	0.588566	0.252023	0.139417	3.35432	2.02589	-0.288897	-0.464559	-0.271543	-0.112891	2.27037	2.05543	1.73451	0.782051	0.66955	0.234986	1.65213	0.949416	0.671767	0.487309	0.690813	0.548648	1.49114	1.01209	0.514356	0.311588	0.304483	0.346583
1	1	0.675689	1.78771	1.42571	0.224976	0.0325801	0.0247248	2.3992	2.9687	1.99232	0.944273	0.747422	0.583082	1.0415	3.0043	1.3834	0.331808	-0.618364	-0.0437268	3.33007	2.97609	1.5599	0.144043	-0.209981	-0.0655547	3.92119	1.77509	2.4935	1.20399	-0.301214	-0.0220195	2.77526	1.41803	1.89145	1.05185	-0.407171	-0.303393
1	1	1.02358	3.06049	2.19883	1.11367	-0.359094	-0.285541	1.72197	1.99071	2.05662	1.72947	-0.321932	-0.265291	1.26024	1.847	0.427024	0.275144	-0.0093865	-0.27095	2.12816	2.26063	2.03348	0.586151	-0.267341	-0.159359	1.86734	1.28996	0.555399	0.442781	-0.109975	-0.385995	0.0764133	0.45121	0.42595	0.525831	-0.0251401	-0.355491
1	1	0.696389	1.2607	1.49137	0.948789	0.0803789	-0.291124	1.3173	1.87832	1.83246	1.11231	0.58151	0.357151	0.22255	0.130869	0.0850219	-0.880804	-1.19004	-0.454362	0.796931	2.28603	2.53531	1.01924	0.455479	-0.0623268	1.43645	1.09148	0.78219	0.87158	0.115812	-0.139152	1.8481	0.647487	-0.134314	-0.711323	-1.19984	-0.411986
1	1	1.26794	1.42464	0.937884	0.784914	0.173416	-0.145723	1.48371	2.26079	1.34745	0.854517	0.508671	0.204878	0.488629	0.469047	0.0302226	-0.517518	-1.17491	-0.235392	2.61152	1.49087	1.12227	0.502695	-0.000376482	-0.128892	1.1355	0.600376	0.732533	0.983653	-0.166561	-0.124534	0.611505	0.19184	0.51972	0.64708	-1.372	-0.811891
1	1	3.29297	2.77042	1.88956	1.41872	0.419262	0.377659	2.39837	1.89067	1.53722	1.18841	0.176641	-0.0266887	0.276139	0.616504	0.00732035	-0.380624	-0.414889	-0.306103	2.14645	1.94275	1.34814	2.30949	0.894425	0.232739	1.03286	0.524033	0.676129	0.284456	0.1544	-0.0757064	1.19649	0.771927	0.0841661	0.293924	0.0970539	0.011363
1	1	2.49442	0.451614	0.586457	0.675079	0.112185	-0.0741755	2.83319	0.779429	1.05812	0.979647	0.588906	0.276223	2.23562	0.992729	0.814463	-0.309537	-1.48046	-0.743675	1.17587	0.611866	0.757411	0.252538	0.0596763	-0.0745395	1.85901	0.972387	0.646619	0.14086	-0.0231791	0.0744766	0.944815	0.0110977	1.11558	-0.513636	-2.03421	-1.06137
1	1	1.49752	0.680212	-0.174985	-0.225037	-0.105432	-0.207352	1.56701	1.19654	0.610869	0.216922	-0.21401	-0.206953	0.695939	0.210565	-0.427727	-0.750629	-1.17161	-0.892824	2.507	1.45036	0.538967	-0.0190612	-0.0664541	-0.133238	2.44003	0.931197	0.189414	-0.0940134	-0.204886	-0.315974	0.8068	0.332388	0.0888733	-0.203283	-0.970449	-0.847703
1	1	0.772422	0.644999	0.0569191	-0.0639828	0.28347	-0.0163802	0.292549	0.34641	-0.0424063	-0.317051	-0.28223	-0.228819	0.116579	-0.181055	-0.405158	-0.425665	-0.491135	-0.19669	1.39867	0.628772	0.442257	0.423006	0.153774	-0.0616803	1.04948	0.531007	0.0557106	-0.162023	-0.476415	-0.442758	0.933448	0.580931	-0.0686923	-0.1343	-0.508036	-0.698543
1	1	1.76701	1.5601	1.28036	-0.0982718	-0.0275128	-0.0230626	0.681654	0.887026	1.02537	0.847787	0.15766	-0.160136	-0.584935	-0.0634044	0.425006	0.252456	-0.688147	0.136335	3.36894	1.88304	1.36988	1.10992	0.210813	-0.18262	2.18954	0.827558	0.697401	0.61123	-0.105232	-0.216108	0.511278	0.33148	0.173836	-0.15413	-0.515728	-0.191575
1	1	1.04161	2.02458	1.97857	1.09955	0.366529	-0.208759	1.09807	1.17759	0.938083	1.38	0.934712	-0.0759996	2.08053	1.81245	0.802788	-0.383418	-0.263391	-0.48971	3.03802	2.95422	1.53188	1.902	0.641151	0.101596	1.39859	2.1658	1.62196	1.66619	0.54293	0.0277529	1.86844	1.57548	1.32407	0.902028	-0.262579	-0.336043
1	1	0.968981	1.02686	0.735017	0.369979	-0.0611348	-0.161553	1.65901	0.948717	0.735067	0.480844	0.0835208	-0.106768	0.434081	0.933433	0.388842	0.126007	-0.690879	-0.109405	1.53027	1.10808	0.833327	0.502719	0.234274	0.107033	2.72061	1.52515	1.01024	0.921531	-0.0602301	-0.100628	2.58945	0.106028	0.350812	0.714253	-0.145642	-0.125541
1	1	-0.89803	-0.250889	0.0852486	-0.196963	-0.295077	-0.354836	0.156679	0.161344	-0.247653	0.203633	-0.159879	-0.60972	-0.829069	-1.63312	-2.44337	-1.38601	-0.780428	-0.913622	-0.10226	0.260927	-0.291887	0.154844	0.010462	-0.583061	-0.30158	-0.375532	-0.393439	0.520589	0.0297453	-0.276325	-0.447263	-0.579658	-1.69903	-1.13753	-0.560539	-0.722257
1	1	1.1272	0.672237	0.458861	-0.12645	-0.216913	-0.0130477	0.856823	0.414475	0.463549	0.347733	-0.156962	0.1499	0.0298435	-0.545935	-0.500162	-0.302305	-0.592978	-0.182823	0.900612	0.558127	0.495864	-0.509854	-0.476951	-0.334555	1.0797	0.301228	0.504771	0.0680097	-0.459522	-0.357722	-0.458191	-0.170161	0.357501	-0.172627	-0.524673	-0.198055
1	2	1.62204	1.14301	0.494382	-0.165411	-0.382201	0.0835044	1.1371	1.26993	0.956738	0.44607	-0.30953	0.0191831	1.13161	0.921786	0.162924	-0.210965	-0.19688	-0.00733711	1.51669	1.48618	1.1107	0.312757	0.267298	0.160874	0.839437	0.788576	0.205059	0.517168	0.502783	0.238964	1.01331	0.217937	-0.185922	-0.260682	-0.251549	-0.373596
1	2	2.06961	1.94769	1.06034	0.261682	-0.0335565	-0.139854	2.4685	1.1368	0.431782	1.10062	0.432899	0.382124	0.45461	-0.183044	-0.299168	-0.565872	-0.628207	-0.11947	0.681225	1.00845	1.00158	0.656748	0.0902531	0.0993173	0.676582	0.215403	0.736621	1.18557	0.536037	0.561118	0.330265	-0.343084	-0.573783	-0.233846	-0.0475243	0.182464
1	2	1.5967	2.21243	1.50097	0.614179	0.134454	0.0267917	2.13336	2.31342	2.811	1.25915	-0.0605462	0.22302	1.30494	1.04791	0.844108	0.294534	0.127213	0.166224	2.10833	2.92593	1.59944	0.429439	0.150401	0.10259	1.84313	1.6576	1.09364	0.296476	-0.2467	-0.113817	0.911252	1.70793	0.644742	0.0691436	0.415752	-0.27743
1	2	-0.478196	0.404972	0.111559	-0.24511	0.14742	0.296182	1.14826	0.058089	0.171681	0.232606	-0.0663822	0.164201	0.159902	-0.473879	0.0769297	-0.294987	-0.474315	-0.013482	1.0355	0.310123	0.043287	-0.281495	-0.47836	-0.189261	0.594231	-0.233012	-0.648712	-0.550208	-0.205036	-0.204586	-0.819108	-1.25768	-1.94953	-1.86798	-0.593614	-0.124456
1	2	0.354944	0.827348	0.959565	0.395314	-0.300402	-0.206883	2.24711	1.96859	1.1572	0.868768	0.0210679	-0.151295	3.29218	1.82392	0.4825	0.531383	-0.267057	-0.381405	0.516793	1.98458	3.54038	0.823687	-0.0680677	-0.411494	1.97563	1.07609	1.90663	1.82445	0.393873	0.0738438	1.32682	1.34401	1.51725	0.850475	-0.19432	-0.308759
1	2	0.968473	0.252612	0.578302	0.144777	-0.190146	-0.103502	0.70316	0.293099	0.24431	0.332266	0.000906676	0.140897	-0.0939584	-0.0889086	-0.204853	-0.223535	-0.367673	-0.0772423	0.644066	0.443767	0.140876	-0.0316856	0.169099	0.0167785	0.252348	0.263431	0.221866	0.393538	0.26648	0.162381	-0.764172	0.0167686	-0.202194	0.0248694	-0.727697	-0.548266
1	2	0.810966	0.85761	0.112378	-0.980881	-0.714185	-0.249605	1.74513	0.721556	0.728888	0.0065785	0.0192273	-0.0358023	0.328886	0.275609	-0.349616	0.0484241	-0.260688	0.0226714	1.63944	1.13846	0.953045	-0.0784618	0.0633809	-0.0622069	0.617242	0.337799	0.45848	0.607094	0.00219337	0.152921	2.4892	-1.09917	-1.12601	0.355983	0.0332931	-0.0183645
1	2	0.501385	1.67161	1.1586	-0.0395818	-0.233841	0.00449521	1.29337	0.571555	1.24681	0.29351	0.201418	-0.0311844	-0.0420169	0.571607	0.0534691	-0.017396	-0.0835544	-0.176475	1.99776	1.72835	0.915367	0.471767	0.0192009	-0.00821723	1.46589	0.791891	0.594954	0.557219	0.0627603	-0.104471	1.08867	0.191012	0.396132	-0.206476	-0.168076	-0.246104
1	2	2.06147	0.954491	0.474494	0.361358	0.00295327	0.185258	2.11687	0.879215	1.20476	0.531651	0.00521077	0.0987239	-0.764451	-0.180656	-0.355547	-0.334709	-0.462105	-0.345837	2.60288	1.58458	1.05046	0.734654	-0.163112	0.192851	1.81237	0.42804	0.471136	0.385422	0.0013847	0.213662	-0.0648283	-0.297328	0.0917289	-0.460899	-0.453225	-0.0576861
1	2	-0.288444	-0.00464262	0.0286212	0.0152539	-0.210272	-0.137123	-0.0439897	-0.116256	-0.126153	-0.070676	-0.288303	-0.176497	-0.0660995	0.0505503	-0.0792859	-0.264168	-0.465612	-0.282609	0.119204	0.193735	0.0527259	-0.194624	-0.455296	-0.232295	0.261606	0.378609	0.156239	-0.106331	-0.187425	-0.2183	0.22619	0.220759	-0.00416405	-0.231172	-0.334373	-0.289818
1	2	1.64252	2.86228	1.5595	0.282886	0.26108	0.12719	2.22736	1.77547	1.3205	1.14556	1.09541	0.524837	0.920343	0.873053	0.625715	-0.040415	-0.428555	0.170462	3.1001	2.56954	1.70234	0.0316849	-0.230999	-0.0292948	1.95776	2.01336	1.00814	0.567171	0.0209636	0.285571	0.851086	0.623401	-0.488653	-0.0436092	-0.560811	-0.338469
1	2	1.63233	0.49499	-0.424917	0.111812	0.35608	0.167765	1.81622	1.95025	1.15668	0.964965	0.530927	0.623107	0.259151	-0.106149	-0.302566	0.282472	-0.0500859	0.032988	2.10437	1.10139	-0.227193	0.486151	0.255404	-0.256629	1.21562	0.991391	0.0973656	0.20589	-0.167978	-0.00235141	0.907636	-1.92438	0.605524	0.481976	-0.367008	-0.389301
1	2	0.238256	-0.0776686	-0.0708364	-0.605848	-0.597204	-0.397481	-0.165783	0.106838	-0.335855	-0.0667152	-0.568577	-0.494711	-0.75223	-0.483015	-0.782033	-0.684796	-1.55139	-1.04844	-0.545033	-0.971755	-0.668174	-0.10069	-0.69996	-0.799122	-0.414091	-0.56478	-0.25037	0.0368508	-0.313807	-0.781348	0.0800801	-0.289317	-0.537005	-0.556832	-1.3304	-0.750276
1	2	1.73404	0.992548	0.284148	-0.306634	-0.154113	0.0559622	2.54534	1.79993	1.09535	0.28645	0.0405362	0.176953	-0.346265	-0.18301	-0.108906	-0.179264	-0.00569668	0.0996299	3.62701	2.48372	1.2921	0.723765	-0.0411075	0.092487	1.10638	0.322126	0.398409	0.491644	-0.191916	0.0274147	-0.061792	-0.301533	-0.0940229	-0.1946	-0.962896	-0.44164
1	2	2.76865	1.22332	0.4151	-0.389202	-0.170108	-0.158381	1.4306	0.966017	1.15663	0.439126	0.332942	0.0394599	0.505629	-0.0295012	0.126257	-0.118377	-0.41276	-0.127556	1.04446	0.379313	0.546799	0.498879	0.0506781	0.0477588	1.58152	0.650181	0.617901	0.625405	0.620318	0.187162	1.66867	0.277139	0.279902	0.25445	-0.338779	-0.101965
1	2	3.03686	1.80214	0.729429	0.53669	0.387851	-0.0754469	2.62803	1.3432	0.788873	0.694271	0.369376	0.0327285	0.770728	-0.340347	-0.421607	-0.621157	-0.456864	-0.18465	-0.0440013	1.2143	1.18568	0.604915	0.0770918	-0.024734	3.28558	1.76094	0.684093	0.63826	0.0064948	-0.0284233	2.6125	0.820977	0.129557	-0.12818	-0.169015	-0.184891
1	2	0.994532	1.61675	1.26252	0.680919	0.0891588	0.173521	1.57245	1.1185	0.668502	1.31224	0.868189	0.49464	1.03264	0.215456	0.1565	0.501698	0.118542	0.0144204	1.70366	1.76517	0.702577	0.326073	0.275352	0.170064	1.00589	0.975668	1.00625	0.64436	0.290209	0.309051	0.954666	0.792915	0.297843	-0.0410603	-0.0201781	0.117645
1	2	2.93433	1.67977	0.30998	-0.100819	-0.0155154	-0.199043	1.64384	1.23828	0.688098	0.41267	0.177465	0.142974	1.19886	0.955469	0.376799	-0.178706	-0.305974	0.0225306	3.5104	1.76747	0.98141	0.54025	0.180869	0.000280885	2.46537	1.41568	0.839757	0.705484	0.0837792	-0.0488549	1.83184	0.919457	0.323393	0.0488437	-0.30393	-0.220654
1	2	-0.199353	0.249663	0.0483357	-0.237369	-0.0262354	0.0834419	-0.920612	-2.06909	0.0514259	0.206229	0.0461227	0.119392	-1.25958	-3.35229	-3.30794	-2.63719	-1.34639	-0.96023	-0.402101	-0.107384	-1.37196	-1.05421	-0.0357555	0.0288387	-0.962226	-1.86709	-1.86622	-1.60129	-0.911547	-0.559911	-3.2223	-4.8349	-4.36328	-3.15873	-1.39777	-0.937472
1	2	0.559934	0.716824	0.796781	-0.0870826	0.391382	0.0811101	1.26623	0.59058	0.0995339	0.886241	0.61501	0.260251	0.632731	-0.0359156	-0.668089	-0.211709	0.111895	0.167596	0.140041	0.571698	0.792936	-0.493952	-0.422749	-0.274315	0.86283	1.05801	1.09541	1.34505	0.767396	0.166752	-0.0163094	0.443594	0.241748	0.496475	0.486185	0.486539
1	2	0.809476	1.40831	0.785063	0.371655	0.196947	0.066771	0.501345	1.11142	0.774475	0.532795	0.0709444	-0.0312992	-0.235956	0.125067	0.228263	0.283793	-0.272517	-0.149749	-0.39692	0.480548	1.11968	0.667794	0.337527	0.0786365	0.843849	1.03848	1.13487	0.670066	0.370622	0.113875	-0.319378	0.0138058	0.259704	0.368546	0.219879	0.0472002
1	2	2.94836	1.37273	1.2099	0.318115	-0.140281	-0.35789	2.48991	1.48338	1.78105	0.928679	0.722335	0.233318	-0.734839	0.0669464	1.06214	0.723266	0.121553	0.0725349	0.048711	1.67181	0.958559	0.0840933	-0.141727	-0.173564	1.50994	1.97311	1.13284	0.59754	0.178345	-0.235078	0.836362	0.288706	0.207828	0.188539	0.0685983	-0.0676194
1	2	2.34559	0.759604	0.2325	-0.236678	-0.29866	-0.0500672	1.29459	1.22227	0.279269	0.271137	-0.0869599	-0.0205088	1.22022	0.873651	0.27404	0.267272	-0.106151	-0.174617	3.11146	1.16782	-0.0147276	-0.0385715	-0.0181922	-0.0702489	1.76628	0.609729	0.251769	0.102217	-0.261534	-0.00784607	2.20553	1.02322	0.362419	0.120837	-0.369275	-0.483573
1	2	2.93524	2.73294	0.771857	0.4814	0.23687	0.0225212	3.58665	2.31736	1.18792	0.452583	0.460409	0.472135	1.77003	1.13135	0.646969	0.0269762	-0.432724	-0.208708	4.0117	2.11528	1.66417	0.72355	0.0012703	0.283842	1.21191	0.713644	1.3419	0.734669	0.0227276	0.257524	0.360729	0.273864	0.532429	-0.165739	-0.440436	-0.24272
2	1	0.5269	0.517721	0.28882	-0.0875661	-0.285077	-0.141846	0.501775	0.414796	0.587848	0.401321	-0.174319	-0.0883875	0.362688	0.187856	0.294438	0.0316966	-0.121478	-0.156779	0.214723	0.491055	0.367008	0.0176989	0.016978	0.0363046	1.17372	0.437076	0.104391	0.161699	0.0903609	0.0949706	0.811239	0.112456	0.124785	0.489562	0.501492	-0.0624964
2	1	3.5416	1.75951	0.744492	0.507418	0.0942012	-0.139399	2.04301	1.769	0.83094	0.661556	0.137204	-0.183249	1.19537	1.5487	0.453594	0.303265	-0.150806	-0.455178	3.25765	2.24167	0.736481	0.161471	0.0649274	-0.014218	4.12662	2.83842	1.21976	0.365232	0.0606271	0.116151	2.13336	1.6889	1.12525	0.421606	-0.254766	-0.262174
2	1	1.57969	1.42673	0.87934	0.80424	0.509459	0.111604	0.624936	0.791188	0.815015	0.364968	-0.0115474	-0.0562366	-0.198317	0.0791777	0.611681	-0.219274	-0.0612616	-0.0652101	1.36631	1.87735	1.09739	0.515687	0.422743	0.300058	0.747753	0.824845	0.49139	0.520303	0.280874	0.259566	0.97193	-0.0954807	-0.18308	-0.300055	-0.670533	-0.425649
2	1	0.580592	2.31464	2.46518	0.908537	-0.121555	-0.144155	2.10639	2.53982	2.07202	1.16001	0.478989	0.391383	1.64171	2.12518	1.03822	0.213476	0.49116	0.391237	0.948061	1.1152	2.10385	2.09402	0.363503	-0.154406	1.1842	1.88686	2.54266	1.28504	0.159534	0.24804	2.11095	3.48323	1.60085	0.867315	0.415249	-0.0677985
2	1	-0.0268444	0.300711	-0.24728	-0.201726	-0.166822	0.195272	0.515874	0.443989	0.141731	-0.00534601	0.273465	0.162389	0.460149	0.464489	0.208133	0.462001	0.00626777	-0.18264	0.163019	0.155579	-0.157078	-0.124675	-0.032498	-0.0324349	0.541285	1.0169	0.582257	0.187752	-0.00899133	0.0655051	0.49659	0.748217	0.261154	0.185823	-0.277177	-0.0655064
2	1	0.272986	0.487528	0.688009	0.373067	0.196727	0.2735	1.49985	1.45395	1.28071	0.535596	0.26828	0.32938	1.70347	1.61809	1.77322	0.909489	0.516722	0.218334	1.75071	1.01096	0.459534	0.121105	-0.0405939	-0.0230792	2.1383	1.1388	1.07012	0.512109	0.199781	0.0743164	1.53013	1.48679	0.912637	0.97576	0.363278	0.398721
2	1	1.25391	1.0053	0.928882	0.599461	-0.144718	-0.305983	1.23457	1.36663	0.829483	1.27115	0.364528	0.0482375	0.518839	0.704343	0.809545	1.0283	0.568015	-0.0501399	0.517678	0.440439	0.168373	0.1856	0.0601148	-0.127845	-0.0100373	0.733504	0.827267	0.692354	0.370869	0.198002	1.05314	1.42127	0.81691	0.738455	0.117248	0.0688766
2	1	1.32039	0.592233	0.839598	0.60031	0.196906	0.0261345	1.54432	0.762696	0.726565	0.615787	0.446179	0.1626	1.1842	0.746798	0.883775	0.512085	0.0104891	-0.184466	0.388029	0.18178	0.353437	0.154993	0.167459	0.111686	0.504289	0.947168	0.647069	0.395475	-0.00545347	0.215291	1.80517	2.34227	0.17822	0.441434	-0.221028	-0.112295
2	1	2.66119	1.72795	0.807662	0.742325	0.0531412	0.123671	3.76995	2.34011	2.17121	1.74668	0.475664	0.0681782	0.518322	0.702396	1.73006	1.58586	1.11348	0.296903	1.07877	1.29459	2.34245	1.30947	-0.023784	-0.106113	2.44439	1.73373	1.2971	1.31522	0.500318	0.22238	1.14517	1.28656	1.48022	1.48651	1.27185	0.443212
2	1	3.18417	2.123	1.38495	1.10924	0.428415	0.0298143	2.32116	1.53419	1.76615	2.23442	1.18071	0.367472	2.45325	1.34933	1.91848	0.762029	-0.526072	-0.219014	2.09224	3.17348	2.1345	0.686332	0.295186	0.0556784	3.3587	3.14594	2.33715	1.2169	0.0699424	-0.12166	3.79121	1.54762	1.19096	0.772659	-0.432131	-0.584846
2	1	0.184758	0.276969	-0.224159	-0.0343089	-0.102159	-0.172765	0.573943	0.110644	0.231012	0.354941	0.236795	0.159882	0.904589	0.700252	0.753702	0.218548	-0.10463	-0.273775	0.779224	0.3573	0.186918	0.190807	-0.00759385	-0.0857556	1.18978	0.69929	0.464832	0.436817	0.39715	0.0876788	1.29145	1.11685	0.636349	0.554293	0.0581889	-0.13892
2	1	4.69093	4.40759	1.99683	0.649335	0.641148	0.118717	4.33705	2.42158	1.96229	0.875386	0.341207	-0.306762	3.06088	3.21662	1.88582	0.0870037	-0.294373	-0.530539	2.79989	1.95371	0.986153	0.740466	0.357871	0.229702	1.56174	1.56199	1.35335	0.596843	-0.111781	0.201449	1.91658	1.29392	1.92867	-0.194526	-2.25317	-1.13737
2	1	1.25903	1.77157	1.42344	0.574995	0.103459	0.0118047	1.89699	1.63456	1.43632	0.973749	0.263256	0.122388	1.5021	0.651379	0.987651	0.630403	0.302461	0.149414	1.2656	1.50957	1.1779	0.650001	0.219895	-0.00231223	1.13195	1.29135	0.709374	0.573544	0.2468	0.270505	1.38934	0.887149	0.817393	0.826307	0.375633	0.183901
2	1	0.837242	-0.0665362	-0.102951	0.272151	0.0556224	-0.114082	0.95722	0.31659	0.421498	0.514157	0.188311	-0.135406	0.555074	0.44221	-0.0600881	0.188336	-0.381702	-0.289972	0.494085	0.41099	0.197219	0.121523	-0.076562	-0.362069	0.548868	0.361096	0.187783	-0.00189633	-0.205594	-0.204245	-0.412917	-0.170578	0.0211441	-0.0728545	-0.131087	-0.289789
2	1	0.310528	0.513735	0.585097	0.160673	0.0223591	-0.153454	1.26963	0.928642	0.575803	0.221427	0.406819	0.0809501	1.0829	1.20773	0.668507	-0.0335841	-0.435057	-0.213967	0.135208	-0.00362841	0.00460061	0.0933742	0.132817	-0.00427781	0.978875	0.0352904	0.0200377	0.257178	0.149789	-0.177448	0.87323	0.480225	0.449685	-0.0441991	-0.38199	-0.477788
2	1	0.111026	0.44272	0.666024	0.236669	-0.00426441	-0.28691	1.13249	1.23046	1.42689	0.402033	0.170662	0.173874	1.08018	1.07023	0.397498	-0.210766	-0.263582	-0.0921891	0.382354	0.509085	1.20105	0.435484	-0.0866111	0.0719417	2.02949	0.850614	0.654679	0.710252	0.158645	0.0475873	0.603474	0.734943	0.440323	0.2069	-0.292927	0.015108
2	1	3.44249	3.20439	2.74249	1.55503	1.29352	0.0933124	5.15055	2.78794	1.48104	1.39947	1.35072	0.0860795	2.14592	2.84777	1.25317	-0.869461	-0.954399	-0.643749	2.23649	2.86201	2.54122	1.91356	1.28341	-0.58219	2.34294	0.545609	0.749671	1.49067	1.50845	-0.81712	2.00167	1.83547	1.72721	1.07272	-0.814515	-1.01297
2	1	1.45854	1.75122	0.808549	0.0518416	-0.322206	-0.108774	1.26226	0.815154	0.863933	0.27059	-0.306696	0.0989833	0.60594	0.286351	0.133636	0.129793	-0.346484	-0.116304	1.17566	1.24414	0.663291	0.326801	0.127621	0.0524338	1.26832	0.755535	0.722248	0.297084	0.36222	0.00333362	0.875971	0.87647	0.483782	0.0393114	-0.113666	-0.0926576
2	1	0.869418	0.496346	0.721598	0.370787	0.0452038	0.128996	2.29167	1.87181	1.14679	0.699734	0.580392	0.354437	0.880856	1.17511	1.33569	1.02361	0.0569617	-0.0748124	1.16231	1.11901	0.761465	0.276139	0.045598	-0.019543	1.27417	1.34641	1.14782	0.407741	0.15959	0.107345	1.35011	1.13399	0.856836	0.439882	0.178976	0.0766079
2	1	1.92983	1.78731	1.00365	0.788415	0.119642	0.068487	1.40413	1.18098	1.37492	1.3621	0.213297	0.183468	1.42386	0.541957	0.360739	-0.295265	0.0733827	0.21278	0.920214	1.17455	0.965702	0.567165	0.160767	0.126163	1.67311	1.65567	2.02427	1.26908	0.313902	0.161003	2.83694	3.28369	3.00973	0.515974	0.0482284	0.2055
2	1	0.8162	0.940917	0.756963	0.424083	0.27339	0.0288568	0.94707	0.359692	0.346172	0.275132	0.243657	-0.0478395	0.698646	0.455137	0.462255	0.617694	0.633677	0.270166	0.809098	0.77524	0.240321	0.328196	0.089798	-0.0751514	1.54992	0.600599	0.181234	0.567786	0.0428229	0.0335182	0.716442	0.492539	0.59563	0.465876	0.118629	0.133003
2	1	1.57176	0.790854	0.150658	0.0816306	0.0616318	-0.154202	1.98016	1.66356	0.923836	0.470569	-0.0602519	-0.202197	0.856718	0.96853	0.839432	0.244178	-0.444263	-0.370183	0.831593	1.20059	0.759078	0.026168	0.118992	-0.0402559	1.40622	0.834734	0.27872	-0.0603341	0.0709976	-0.117952	0.298308	1.12378	0.954431	0.0422999	-0.187621	-0.480826
2	1	1.61988	2.10651	1.71864	0.363207	-0.252569	-0.111944	1.50058	2.24483	1.83121	0.499064	0.387357	0.0633153	1.2659	0.710795	0.473948	-0.0380754	-0.0533558	0.478468	2.29743	1.60124	1.07332	-0.0618442	-0.181477	-0.243198	1.19898	0.997379	0.682933	-0.147589	-0.211468	-0.185374	0.210761	0.356433	0.591214	-0.204796	-0.277213	0.293439
2	1	1.78966	0.69111	0.519728	0.812508	0.572001	0.0875482	2.70703	1.60389	1.87567	0.732517	0.357107	0.0456965	1.97525	1.16044	0.972315	-0.0340697	-0.201191	-0.33303	1.28896	2.06333	0.981888	0.203144	0.186161	-0.231031	1.96205	1.15351	0.661043	0.16567	0.0802004	-0.189603	1.26368	1.03424	0.818273	0.245911	-0.326438	-0.541672
2	2	-0.16008	-0.288817	-0.201686	-0.119211	-0.0846578	-0.0886959	0.852421	1.23516	0.689564	0.11796	0.0390215	0.0803935	1.14869	1.03831	0.7932	0.0569688	-0.114026	-0.0393143	-0.256736	0.24502	0.312282	0.113674	0.0515205	0.0583843	1.9686	1.6334	1.98449	0.770331	-0.000670501	0.00756529	2.05778	2.31766	1.70449	0.553835	0.3222	-0.125515
2	2	2.99328	2.41127	0.579194	0.168117	0.170257	-0.0664982	2.73508	2.45122	1.1127	0.437876	0.378831	0.143808	1.49222	1.1547	0.896709	0.878383	0.00389138	0.125236	1.53767	1.51956	1.54072	0.548993	0.157623	-0.0356628	2.40214	1.74789	1.12571	0.474777	0.35372	0.180297	2.96344	1.90692	0.969263	0.614564	0.0376789	-0.093983
2	2	0.295355	0.148166	0.0605617	0.0281688	-0.155778	-0.153431	0.705713	0.576735	0.125732	-0.127681	0.245073	0.215806	0.189143	0.177523	0.137785	0.148854	0.112469	-0.00853035	0.388784	0.32618	0.198718	0.210998	0.032648	-0.119743	0.533696	0.634544	0.192384	0.131649	0.270747	0.0350269	0.351098	0.3494	0.212023	0.58779	0.595955	-0.0788933
2	2	0.0463295	0.0626667	-0.0453877	-0.147167	-0.302588	-0.05078	0.17185	0.124451	0.0231304	0.00429825	-0.202317	0.0434067	0.0831846	-0.030168	0.021072	-0.274621	-0.24548	0.0220609	0.00631371	0.295464	0.228641	-0.182988	-0.0933706	0.0231088	0.0464065	0.206231	0.0999189	0.0902145	-0.0473765	0.132513	-0.11188	-0.163448	-0.249284	-0.130717	-0.344295	-0.0949719
2	2	0.89368	1.28661	0.529945	0.0662705	-0.111251	-0.224762	4.5825	1.80884	0.772542	0.356007	0.216825	0.11218	2.48239	0.982665	0.735941	-0.00913578	-0.550516	0.252146	0.139319	0.205437	1.03575	9.18858e-05	-0.175086	0.14973	1.68981	1.95715	1.16228	0.229094	0.132954	0.221435	1.86926	1.74084	0.419717	-0.444955	-0.595947	0.164788
2	2	0.0825492	1.52	1.7009	0.167467	0.0266662	0.0244505	1.94706	2.45241	1.76663	0.565541	0.271785	0.259661	3.25826	0.538319	0.676827	0.603226	-0.642178	-0.289805	0.848352	1.26217	1.05529	0.536291	-0.0749483	0.0682372	2.36583	1.51977	1.99183	0.793262	-0.0843686	0.187889	0.463522	0.00196675	0.731652	0.0802834	-0.704888	-0.0296157
2	2	1.6577	0.808562	0.572556	0.120845	-0.11793	0.112356	2.2954	1.04964	0.707641	0.362961	0.00617204	0.0605266	2.53119	1.02356	0.872788	0.237446	-0.0665252	0.189425	1.87828	1.93627	0.773136	0.431058	0.145834	0.00353004	1.79776	1.26762	0.757009	0.397611	0.184608	0.117216	1.8564	1.24859	0.860634	0.66465	0.0112851	0.244839
2	2	0.344444	0.161698	-0.0800543	-0.484019	-0.417409	0.00744566	0.365826	0.0934546	-0.200725	-0.193177	-0.503697	0.0363753	0.371457	-0.0617063	-0.448581	-0.0275768	0.205474	0.134493	-0.150205	0.0952207	-0.00651458	-0.311266	-0.322855	-0.111973	0.146335	0.504038	0.278339	0.0751332	-0.0487072	0.169783	0.681749	0.6818	0.292759	-0.19522	-0.12023	0.173622
2	2	0.421597	0.815072	0.239827	-0.0952781	-0.0205477	-0.112498	0.937178	1.33188	0.192404	0.00672177	-0.0208142	-0.101324	0.552678	0.672945	0.249331	0.196115	0.106045	-0.301531	0.452988	0.231536	0.111461	-0.488978	-0.519929	-0.210821	1.25095	0.481524	0.535006	0.416507	0.0387566	-0.215185	2.01522	-0.251428	0.935482	1.09791	0.266329	-0.17212
2	2	2.39385	1.19129	1.54638	1.36682	0.429795	0.145058	5.09965	1.12202	0.854457	1.52812	0.753034	0.242816	4.06478	1.66547	0.695585	0.789436	0.249772	-0.0283161	1.41801	1.50526	0.833053	0.991182	0.526818	0.0793631	1.66812	2.04376	0.913699	0.758707	0.731052	0.748018	3.48819	0.974579	1.17034	0.80671	0.576302	0.34639
2	2	1.3315	1.04241	0.665571	0.396117	0.108263	-0.0311617	1.06174	1.18689	0.927121	0.414798	0.517888	0.116135	0.865053	1.01587	0.946309	0.739633	0.501083	0.392302	0.833157	0.65994	0.0273633	-0.242596	-0.137906	-0.0373017	1.29803	1.1948	0.574595	0.160723	0.0882014	0.170219	0.797	0.748402	0.566928	0.497757	0.318319	0.277987
2	2	1.78463	0.75675	0.213129	0.179914	0.259927	0.00225321	0.89221	0.544216	0.853957	0.780196	0.369512	0.228058	0.426174	0.486552	0.210645	-0.0243656	-0.272907	-0.163283	1.87184	1.46332	0.944723	0.240902	0.271856	0.242594	2.01817	0.958254	1.20251	0.362302	0.0585511	0.0104268	1.08416	0.288176	0.153204	-0.221855	-0.332922	-0.223562
2	2	0.925379	0.455915	0.362542	0.24207	0.0730115	-0.0158523	1.24992	1.25441	0.612681	0.314526	0.128122	0.0853325	1.59083	1.31698	0.992617	0.272087	-0.252421	-0.0747004	0.807939	0.863396	0.437618	0.0224161	-0.160736	-0.0719025	1.50773	0.557209	0.611396	0.489344	-0.0728591	-0.00151291	0.21282	0.583525	0.652217	0.0502009	-0.497131	-0.13026
2	2	0.553084	0.828324	0.331037	0.0151384	0.0291421	-0.0819121	1.00756	0.999974	0.205146	-0.0382293	0.154122	0.0466485	1.1231	0.19501	0.367335	0.121556	-0.111217	-0.293931	0.267315	0.351294	-0.0250693	0.0181972	-0.207488	-0.172283	0.77488	0.686164	0.163122	0.0286698	-0.137893	-0.19148	0.891511	0.543434	0.23719	-0.00750606	-0.163503	-0.117245
2	2	0.778194	0.322469	0.429314	-0.213777	-0.372015	0.0129938	2.08211	1.04757	0.417171	-0.066838	-0.578793	-0.181698	1.59462	0.828829	0.534169	0.15666	-0.48254	-0.50714	1.53915	0.538488	0.83542	0.176843	-0.402242	-0.172479	0.71925	1.19779	0.954873	0.190511	-0.324958	-0.295131	1.06322	0.836944	0.607892	0.191379	-0.185716	-0.367367
2	2	1.5864	0.916877	0.632004	0.226501	0.112592	-0.137241	0.57843	1.06358	0.815331	0.418671	0.135958	-0.0172385	-1.08068	-0.524053	0.262524	0.205196	-0.562703	-0.0376616	1.57819	1.32567	0.731142	0.178126	-0.0559756	-0.0211276	1.14501	1.02568	0.848803	0.360353	-0.0482243	-0.110679	-0.014921	0.241152	0.476579	0.436757	0.107196	-0.18507
2	2	0.609325	-0.191758	-0.110793	-0.0755861	-0.135105	-0.124235	1.40165	0.353429	0.410127	0.477497	0.388187	-0.161212	0.955344	-0.0896981	0.0603914	0.0924261	-0.462123	-0.475859	0.333033	0.8155	0.607897	0.495701	0.0386059	-0.086046	0.915794	0.897728	0.995665	0.551189	0.0280408	-0.208837	0.783506	1.25885	-0.0465251	0.302005	-0.230181	-0.243266
2	2	1.22891	0.307665	0.404513	0.131498	-0.0442002	-0.0741756	1.90271	1.30355	1.15346	0.709961	0.290908	0.184924	0.633288	0.616123	0.4906	0.35145	-0.119475	0.0405109	0.877575	0.208166	0.147149	0.284856	0.222317	0.00706804	0.636368	0.888557	0.73734	0.542278	0.29439	0.139296	0.777354	0.565782	0.0322748	-0.113893	0.120744	0.0930343
2	2	0.399082	0.662222	0.479097	0.189882	0.141973	0.0344115	1.37928	0.737651	0.573726	0.351816	0.20832	-0.0326735	0.948237	-0.081498	-0.176019	0.28432	-0.438859	-0.358068	0.484374	0.485535	0.73078	-0.146364	-0.311391	-0.157306	0.949327	0.453045	0.401879	0.208099	-0.0536237	-0.143697	-0.398922	-0.180087	0.205136	-0.234712	-0.430356	-0.555898
2	2	1.40877	0.911068	1.31672	0.472587	0.195016	0.100088	1.67564	1.75639	0.986107	0.846038	0.763041	0.394364	1.17226	1.37928	1.03839	0.69049	0.514289	0.466588	1.9379	1.24109	0.0817212	-0.630078	-0.0879081	0.168008	1.41279	0.710591	0.274891	0.317963	0.124919	0.207341	1.37958	0.604401	0.836126	0.471637	0.123026	-0.00670886
2	2	0.229577	-0.0554031	0.123081	-0.00364743	-0.0109387	0.0857551	0.918242	0.814105	0.393313	0.203622	-0.0854187	0.184287	0.227632	0.671996	0.455625	0.299895	0.172032	0.187256	0.633881	0.378588	-0.263953	-0.00673279	-0.128583	-0.00168063	1.03848	0.749033	0.818643	0.364258	-0.0512731	0.264669	0.775148	0.353523	0.439473	0.845332	0.053836	0.070622
2	2	2.99507	2.66155	1.25936	0.1214	0.193845	0.046439	2.35643	2.32012	1.33337	0.786972	0.465182	0.195943	1.90034	1.00021	1.23928	0.827197	0.437008	0.216517	1.6472	0.695836	0.868265	0.44011	0.206386	0.0121084	1.39037	0.923491	0.839597	0.470589	0.207639	0.0436124	2.53397	1.59033	0.805696	0.483278	0.209279	0.180281
2	2	0.362271	1.08722	0.670153	0.0797738	0.0777571	-0.0055137	0.734131	0.557351	0.530857	0.372251	0.155628	0.0139813	0.792745	0.353919	0.40622	0.71162	0.0668763	-0.0597824	0.308173	0.229175	0.392059	0.590544	0.293334	0.0386082	1.04036	0.81571	0.538567	0.540857	0.320713	0.185049	1.04582	0.400789	0.532518	0.764038	0.51425	0.016071
2	2	2.78002	1.00662	0.100874	0.113161	-0.0708242	-0.0952165	0.775654	0.432562	0.0922749	0.432198	0.309355	0.0266329	0.172785	-0.172174	0.0725133	-0.00429434	-0.184512	-0.0152048	1.22826	1.33352	0.443165	0.0174195	0.11486	0.0661913	1.31852	1.35549	0.804136	0.508312	0.286983	0.23228	1.78421	0.51069	0.361833	0.977182	0.578294	0.2215

## Sheet: Faces
language	dyslexia	-48-73-16	-48-64-16	-48-55-16	-48-46-16	-48-37-16	-48-28-16	-39-73-16	-39-64-16	-39-55-16	-39-46-16	-39-37-16	-39-28-16	-30-73-16	-30-64-16	-30-55-16	-30-46-16	-30-37-16	-30-28-16	48-73-16	48-64-16	48-55-16	48-46-16	48-37-16	48-28-16	39-73-16	39-64-16	39-55-16	39-46-16	39-37-16	39-28-16	30-73-16	30-64-16	30-55-16	30-46-16	30-37-16	30-28-16
1	1	1.00411	0.984532	0.844584	0.409025	-0.0291396	-0.130298	2.44543	1.9573	2.07314	1.30006	0.351394	-0.00162745	2.0134	2.41433	2.3445	1.17543	0.647239	0.181351	2.00699	2.31723	1.47542	1.29649	0.291005	0.133675	3.141	2.63266	2.88173	2.13562	0.751137	0.109895	1.90618	2.1958	1.94734	1.22129	0.85846	0.606516
1	1	1.31089	1.34676	0.470978	0.101567	-0.108007	-0.171859	1.95685	2.2761	1.55536	0.686821	-0.103235	-0.148996	1.56443	1.08006	0.666433	0.0532138	-0.355027	-0.190339	2.69585	2.42477	1.8439	0.545802	0.150322	0.0571456	4.60031	2.48846	1.78007	1.06441	0.0725	-0.0812596	0.836037	0.1893	0.932909	0.669094	-0.0112934	-0.11792
1	1	1.5226	0.874846	0.128541	-0.139256	-0.110663	-0.2013	1.93132	1.02234	0.920743	0.718719	-0.20512	-0.0693251	0.832856	0.688192	0.471224	-0.346915	-0.855575	-0.615572	3.92175	3.30742	2.57946	2.22762	0.768092	-0.289523	4.96737	3.44168	2.87558	2.55052	0.785973	-0.0697767	1.4308	1.39813	0.110387	-0.469789	-0.470375	-0.798443
1	1	2.32409	2.84821	1.26117	0.677047	-0.0417729	-0.119023	2.77376	2.30865	1.71126	0.868951	0.0353088	0.0448196	1.87071	0.349517	0.340089	0.200628	-0.197813	0.0445662	1.96245	2.27177	3.6778	1.29567	0.11679	-0.0518239	2.34648	1.8442	2.53566	1.6458	0.00192441	0.150986	0.990174	0.0771327	0.768425	0.36485	0.227779	0.147622
1	1	1.12582	0.708008	0.636746	0.14117	0.17391	0.00124225	3.4953	2.3936	1.45799	0.971677	0.0881985	-0.279439	1.54143	0.216166	0.625881	0.0890691	-0.771494	-0.30399	3.76457	2.13062	1.13955	0.700173	0.149785	-0.00396627	3.16415	2.59648	2.13386	2.67989	0.610813	0.241316	2.77297	2.44159	1.17647	-0.153752	-0.553075	-0.327505
1	1	2.08005	2.08385	1.5249	0.926635	-0.24287	-0.251784	1.58588	1.28771	1.33248	1.0465	0.473463	-0.0933164	0.608126	0.881274	1.13616	0.512725	0.232847	0.292472	0.54244	2.05084	1.51361	0.449944	-0.0783177	-0.311275	2.73053	1.45918	1.11923	0.428884	-0.120918	-0.23973	5.06299	0.840588	0.270321	-0.265881	-0.0507846	-0.0515965
1	1	2.89094	2.2469	1.62225	0.409662	-0.208003	0.101192	4.77186	4.22385	1.90275	0.509961	0.195249	0.387164	3.22907	2.1931	0.983295	-0.0136644	-0.460384	0.0954123	1.46901	2.8682	2.06708	0.277314	0.117032	-0.0869741	2.54248	1.30661	1.18217	1.03504	-0.0653652	0.0545338	3.91283	0.26195	0.228916	-0.291826	-0.940163	0.137705
1	1	-0.973308	-0.710138	-0.248972	0.0111701	-0.159891	-0.452237	0.0575758	-0.241579	0.22875	0.308554	-0.241067	-0.307823	-0.13454	-0.679132	-0.383393	-0.358383	-0.714458	-0.418206	0.657955	-0.15757	0.0173259	0.612616	-0.372757	-0.292668	1.81746	1.15035	0.769352	0.824432	-0.163307	-0.278836	0.820556	-0.111495	0.222306	-0.079644	-0.646378	-0.530156
1	1	1.40519	0.225311	1.39154	0.543934	0.138496	-0.225686	2.59276	0.996103	1.18434	0.601677	0.204965	-0.245498	2.14038	-0.538777	-0.754055	-0.60569	-0.351994	-0.35172	0.730826	3.31895	1.78045	0.421924	0.0353179	-0.0290186	2.968	3.46417	2.57107	1.17641	0.330869	0.0942812	2.1219	0.628446	0.426747	0.376814	-0.227768	-0.159521
1	1	0.0112001	0.346011	0.832215	0.777986	0.0969468	-0.00819582	2.51044	2.34704	1.34851	1.19131	0.642777	0.150283	1.41451	1.96596	1.26358	1.04511	0.248084	0.238618	2.98352	2.43719	2.53091	2.12803	0.588884	0.26717	4.65273	3.18058	2.7646	1.84573	0.809302	0.811197	2.2923	2.23241	2.28263	1.17115	0.969436	0.824476
1	1	1.5662	2.16441	1.17754	0.202081	0.22409	0.222831	2.64773	1.93913	2.97763	0.541602	-0.19452	0.0211738	2.87254	2.29989	0.532591	-0.105339	-0.240705	0.108433	0.855164	2.38475	2.19165	0.734021	0.511591	0.243886	1.66132	1.91823	0.979237	0.520813	0.0974036	0.0739628	0.837432	0.675094	0.224334	-0.87942	-0.423214	-0.0842393
1	1	-1.07107	0.843792	0.279239	0.0159103	-0.271701	0.0284022	0.918832	1.61174	1.17516	0.621383	0.506194	0.543393	0.0019302	1.77239	0.216514	-0.32467	-0.518161	-0.114772	1.40576	1.59884	1.00425	0.37158	-0.188018	-0.156127	3.6562	1.06964	1.50824	0.924795	-0.146974	-0.100569	1.31588	0.447874	0.561777	-0.0218791	-0.79721	-0.505984
1	1	1.99915	2.04222	0.198366	-0.16638	-0.176739	-0.123346	2.49695	2.04533	0.835647	0.385087	-0.114417	0.205411	1.04088	1.2715	0.530559	0.0488764	-0.168615	-0.0797892	2.69102	2.78001	2.08843	0.621605	0.168189	0.179749	2.81784	1.90147	0.90314	0.613402	0.0421463	0.0761877	0.945232	1.06053	0.584788	0.797082	0.255429	-0.317044
1	1	0.756302	0.973556	0.803203	0.324795	0.262003	0.214742	2.44998	2.18218	2.1358	1.33515	0.233732	0.558101	1.40891	1.2414	1.03994	0.139426	-0.695454	-0.369242	1.61846	2.20079	1.48754	0.221986	0.375272	-0.221759	1.4916	1.69191	2.07891	0.595195	-0.0959626	-0.348163	2.83614	2.02515	0.971653	0.0988396	-0.849343	-0.380638
1	1	1.5299	1.06265	0.917674	0.324956	-0.13147	-0.189161	2.26227	1.40518	1.0284	0.881067	0.455713	0.186389	1.01523	0.965224	0.680063	-0.134056	-0.535481	-0.140297	3.52218	2.50349	1.4492	1.13997	0.31683	-0.329596	2.46832	1.97994	1.51412	2.39384	0.703766	0.0729233	0.814402	0.54179	0.785409	1.27954	0.227787	-0.251541
1	1	2.17225	1.54654	0.158499	0.0612873	-0.0457107	-0.0780865	3.058	2.08458	0.859287	0.299467	0.110963	0.00149982	1.70027	1.15591	0.863672	0.221429	-0.233326	-0.0431454	3.12619	2.58542	1.48477	0.696891	-0.158313	-0.422088	2.55142	2.01282	2.19458	1.43296	0.151447	-0.0127138	1.73429	0.408472	0.842179	0.790454	0.437404	0.210261
1	1	1.98395	0.0411261	0.328127	0.522714	0.087113	-0.114886	2.69547	0.928707	1.57899	1.66979	0.944907	0.391194	3.22767	1.6118	1.55592	0.676739	-0.932634	-0.770289	1.95244	0.932671	1.1884	0.489021	0.265704	-0.200418	2.35303	1.38858	1.53865	1.62232	0.905032	0.29469	1.27841	0.738199	2.04945	0.449676	-1.34635	-0.728662
1	1	2.33996	1.89788	0.260848	-0.0241849	-0.0742246	-0.178418	2.43631	1.91937	1.52572	0.383566	0.0646714	-0.101265	2.23106	1.29111	0.62056	0.294796	-0.0915852	0.0630775	2.56301	2.56913	1.08393	0.187998	0.00107027	-0.0318505	3.17604	2.17902	1.10274	0.570292	0.0984238	0.0793109	1.54547	1.32371	0.417956	-0.0250153	-0.474553	-0.078551
1	1	0.579649	0.706404	0.445958	0.318284	0.191498	0.0326606	0.952779	1.09519	0.794763	0.668503	0.36368	-0.116452	0.841977	1.02759	0.580861	0.536102	0.535034	0.484997	-0.721612	0.0388284	0.386937	0.544561	0.400413	0.23114	0.373286	0.559335	0.559281	0.400901	0.669521	0.577516	0.770935	0.574252	0.338281	0.230733	0.174533	0.551489
1	1	2.18705	1.12315	0.564552	-0.0141861	0.273437	0.23656	1.46716	0.429963	0.808569	0.928825	0.408935	0.238223	-0.545007	0.046889	0.641855	0.23023	0.156036	0.341198	4.47668	2.25935	1.38476	1.2191	0.767766	0.362576	3.10401	1.72658	1.31502	0.900153	0.33116	0.119148	1.17101	1.01458	0.592576	0.00699627	-0.321389	-0.145792
1	1	1.94761	2.41626	1.57796	1.00287	0.202684	-0.0608096	2.64298	2.00997	1.41165	2.2933	1.08653	0.00665182	2.95007	2.64253	1.31933	-5.12808e-05	-0.371735	-0.275667	3.86283	3.54279	1.75322	1.68607	0.409785	-0.103383	2.2445	3.03497	2.69484	2.3428	0.634563	0.0079431	2.74742	2.44914	1.68925	1.49483	0.0974685	-0.0303772
1	1	0.180938	-0.382125	-0.621374	-0.290284	-0.371885	-0.17531	1.54526	1.2881	0.410198	0.00619898	-0.265421	-0.0946135	-0.0261383	0.746516	0.791627	-0.284464	-0.930511	-0.289473	0.168189	-0.166865	0.961101	0.83224	-0.0949299	-0.309506	2.03271	0.784765	1.20608	0.799513	-0.18935	-0.378838	2.23067	-0.359877	0.184867	0.0100912	-0.455936	-0.494815
1	1	1.5188	1.5484	0.744597	0.765511	0.374963	-0.0026335	3.17511	2.15391	1.04943	0.914904	0.350737	0.102032	3.03745	2.12408	1.05193	0.420034	0.394061	0.0840535	3.05209	2.39488	0.949813	0.737451	0.449308	0.202479	2.5027	2.07298	1.39624	0.781129	0.381054	0.0538839	1.83666	0.72285	0.519634	0.473025	0.211023	0.165504
1	1	2.58044	2.43475	0.911791	0.678818	-0.0527942	-0.125284	2.50554	1.88989	1.60731	1.17767	0.385998	0.0866757	1.38963	0.39637	0.322737	0.265778	0.115812	0.354358	3.11467	3.17707	2.46919	0.818665	-0.13535	-0.146996	2.61217	2.56934	2.2349	1.32368	-0.10892	-0.311058	1.29152	1.66068	1.61672	0.642701	0.334573	0.143468
1	2	0.693359	0.635074	0.420538	0.487453	0.311919	-0.0172005	2.04449	1.75242	1.20253	0.734986	0.538184	-0.183115	1.98004	1.2976	0.836872	0.151625	-0.128194	-0.0819901	1.69401	1.61571	0.907821	0.741286	0.174627	-0.039414	1.82011	1.64402	0.839168	1.12677	0.575703	0.388444	2.14001	1.07724	0.80841	0.37119	0.292427	0.27445
1	2	-0.205882	0.114088	0.218169	0.0158643	-0.34104	-0.147694	2.09974	0.895343	1.11858	1.2404	0.384008	0.298317	0.382254	-0.184205	-0.017372	-0.4129	-0.332671	0.0253724	1.19871	1.11128	1.40895	0.661592	-0.018536	-0.02596	0.707123	0.654223	1.57214	1.58278	0.358181	0.381968	0.797503	-0.346194	-0.587615	-0.754763	-0.852223	-0.604656
1	2	2.0292	1.98831	1.1567	0.145847	0.0939818	-0.150222	2.4283	1.79954	3.1272	1.14159	-0.20029	-0.0736118	1.70467	0.676987	0.551751	0.103595	-0.346287	-0.047161	2.06475	3.25495	1.98905	0.637161	0.437996	0.0976417	2.85613	2.44727	2.06087	0.825712	-0.103615	0.097607	1.57552	2.34057	1.00353	-0.0197026	-0.167144	-0.434472
1	2	-0.27633	-0.366874	-0.608141	-0.33933	-0.223487	-0.0878234	2.49341	0.319899	0.0675307	0.272394	-0.16117	-0.0205139	1.48387	0.282597	-0.196638	-0.204163	-0.77981	-0.550069	2.27116	2.10834	0.778722	-0.158015	-0.392977	-0.308246	2.43964	0.993487	0.535069	0.488276	-0.208565	-0.317196	0.544802	-0.0776008	-0.0832407	-0.486422	-0.845802	-0.393278
1	2	1.50602	0.719155	-0.094352	-0.0725921	0.169335	0.064344	2.84514	1.56698	0.613029	0.718547	0.227946	0.0687523	4.19214	2.88783	1.22396	0.792704	0.328878	0.155773	1.1203	2.15906	2.80623	1.16584	0.320098	0.0812253	3.10034	3.17501	3.40468	2.47203	0.993767	0.555151	2.46279	2.0805	2.60214	1.37683	0.27386	0.154782
1	2	0.498895	-0.491051	-0.0517711	-0.493616	-0.594976	-0.431311	0.378238	0.41015	0.486302	0.156314	-0.55716	-0.474641	-0.744882	-0.514182	-0.628362	-0.831995	-1.30144	-0.843755	1.1175	1.66974	1.0737	-0.134466	-0.50288	-0.681434	0.450336	0.257321	0.0610835	0.188855	-0.23956	-0.528677	-1.90314	-1.61524	-1.16887	-1.02437	-1.54861	-0.945001
1	2	0.509655	0.749546	0.163196	-0.762093	-0.675181	-0.145032	1.94722	1.15539	1.77141	0.54071	-0.167146	-0.004044	0.197627	0.0462915	0.359964	-0.0807614	-0.697187	-0.439949	1.49712	2.59608	2.24778	0.441206	-0.0816034	-0.101356	2.14627	1.36637	1.56208	1.22848	0.0536587	0.00707961	3.43878	-0.687942	-0.811403	-0.0983266	-0.132282	-0.0394447
1	2	0.924176	1.59932	1.1014	0.145928	0.0440517	0.143057	3.06929	2.3228	2.23871	0.579971	0.213472	0.319275	0.523659	0.299632	0.380145	-0.012516	0.094092	0.194275	3.28671	1.74762	1.34335	0.429368	0.0367524	0.0350514	2.78469	1.64833	2.02729	0.943925	0.314559	0.329141	1.59632	-0.128334	0.431484	0.68027	0.0732134	0.153186
1	2	2.0692	0.675756	0.0582764	-0.261623	0.0369392	-0.011799	2.37436	1.34192	2.13037	0.384435	-0.35733	-0.115864	-0.469812	0.29778	0.502522	-0.436966	-0.348903	-0.162941	3.42739	2.7735	1.78041	0.491492	-0.513028	-0.19403	3.00564	1.91849	1.8283	1.08512	-0.213913	-0.338604	0.653764	0.299693	0.156239	-0.091139	-0.175977	-0.0333268
1	2	1.29367	0.720574	0.373987	-0.0633095	-0.321926	0.136136	0.740484	0.510999	0.210056	-0.200616	-0.334948	-0.175335	0.547718	0.917869	0.30716	-0.237019	-0.629242	-0.384361	1.01133	1.98379	1.10232	0.995963	0.0914759	0.217877	1.03229	2.20289	1.18449	0.81126	0.415427	0.000556951	2.20312	2.11444	1.10255	0.602406	0.442106	0.423888
1	2	0.713869	0.50593	0.636395	0.556378	0.291464	0.101353	2.09533	0.462505	0.985687	0.294539	0.403532	0.136427	0.924919	0.529926	0.552148	-0.256858	-0.507533	-0.391595	4.11323	3.10784	1.61618	0.241224	-0.032233	-0.266163	3.69105	3.02086	1.79277	0.687886	0.245745	0.0907791	1.1352	1.50177	0.942654	0.928598	-0.300095	-0.179017
1	2	-0.151194	-1.06565	-0.940482	-0.184054	0.0759649	-0.0244693	1.2439	0.828044	1.63027	1.2047	0.352026	0.316264	-0.0716523	0.0308658	0.15206	0.0288073	-0.0999003	0.0222891	-0.120806	-0.16386	0.00627278	0.0304251	-0.26139	-0.0039325	1.18293	0.956992	1.53075	1.16308	0.22326	0.21103	0.724201	-0.841473	0.43274	0.393025	-0.256734	-0.333721
1	2	0.259417	0.219267	0.124007	0.497728	0.356245	0.264141	1.36946	0.757046	0.931221	0.314606	0.337817	0.215129	0.820261	0.619541	0.178551	0.166364	-0.564757	-0.221293	2.77162	1.59844	1.06439	0.968469	1.00244	0.35078	1.41298	1.14567	0.737657	0.74954	0.396196	0.263193	1.51513	0.0788347	0.450452	0.642558	-0.409549	-0.0376784
1	2	1.27214	0.716401	-0.18138	-0.152808	-0.0250698	-0.0695669	1.40864	1.39308	1.56801	0.476403	-0.0086043	0.217033	-0.486585	-0.0935001	0.212078	-0.0820828	-0.204687	-0.0912937	3.68545	1.77552	1.27461	0.732673	0.0393713	-0.0985154	1.84336	1.24501	1.21561	1.14531	0.0342801	0.190267	0.113612	-0.41405	0.142194	-0.16059	-0.675539	-0.137313
1	2	2.65062	0.93784	0.441943	-0.31836	-0.30978	-0.291214	2.0811	0.76163	0.816858	0.656937	-0.0374433	-0.0500457	2.03016	0.78903	0.830386	0.760992	0.259095	0.0571086	2.52178	2.19316	1.42608	0.601469	-0.123002	0.142831	2.33162	1.90193	1.55739	1.54267	0.754601	0.310544	2.74808	1.10288	0.947059	0.906903	-0.115735	-0.394397
1	2	1.20268	0.503723	0.330772	0.214524	0.00470779	0.0975039	1.3988	1.04301	0.975118	0.371049	0.0993076	0.175267	1.4907	1.17572	0.728363	0.0226874	0.109184	0.0987629	0.426831	1.4067	1.10856	0.667672	0.305288	0.0693716	2.30341	1.33547	1.44469	1.19946	0.443602	0.11504	2.85837	1.45121	1.23832	0.629163	0.333591	0.332162
1	2	1.60637	0.97262	0.843159	-0.0609221	-0.181499	-0.0126984	2.16448	1.40543	1.46688	0.940395	0.524632	0.300425	1.06794	0.456786	0.19495	-0.360059	-0.51026	-0.340112	1.39784	1.53071	1.34569	1.01398	0.36813	-0.00524214	2.12158	1.49441	1.50134	1.27169	0.357715	0.129803	1.07563	0.0884181	0.290667	0.182715	-0.206973	-0.162138
1	2	2.82929	0.778061	-0.0811942	-0.469927	-0.226138	-0.231299	2.71716	1.9662	0.832955	0.191355	-0.239818	-0.159512	1.59164	1.37235	0.625208	0.120049	-0.242933	-0.221793	4.5674	2.88709	1.07559	0.670913	0.167761	-0.175011	4.20231	2.97763	2.12203	1.3458	-0.118203	-0.441786	2.97056	1.59753	1.09996	0.721364	-0.0204353	-0.0438403
1	2	0.432698	0.756784	1.33201	0.312141	0.380422	0.314206	0.50487	0.874215	2.48003	2.09952	0.731276	0.678006	1.28088	-0.159791	-0.845047	-0.498119	0.00438205	0.243002	0.696552	1.50392	1.17544	0.206093	0.452668	0.217268	2.22947	0.873024	0.819072	0.564665	0.444453	0.112272	-0.247408	-2.29069	-1.86855	-1.28818	-0.166027	0.0666205
1	2	0.27336	-0.500658	-0.245632	-0.501934	0.0770569	-0.116467	2.11771	2.19626	0.813445	0.585653	0.106235	-0.0165249	1.1126	0.823088	0.378436	-0.0787681	-0.304433	0.126594	0.0946809	-0.257029	-0.928218	-1.00026	0.0280844	-0.142871	1.9712	1.96324	1.4657	1.36161	0.223975	-0.215392	-0.217045	-0.737873	-0.0787568	-0.311792	-0.848116	-0.321905
1	2	1.47403	1.06995	0.261473	0.0397554	-0.0422439	0.0993729	1.13263	0.871953	0.507722	0.233108	-0.0933701	-0.0199702	-0.0381567	0.0881445	-0.133969	-0.263976	-0.473456	-0.208334	0.695209	0.94891	0.74559	0.462572	0.0423887	0.24669	1.96076	1.76918	1.1346	0.498094	-0.0647608	0.00926698	0.457398	0.428344	0.0108698	-0.230386	-0.205672	0.0714657
1	2	2.11035	0.0474246	-0.0631546	-0.257852	-0.205694	-0.363491	2.14113	1.20446	1.01688	0.652848	0.477513	0.167376	0.291779	0.317684	0.317427	-0.0478229	-0.812946	-0.535837	0.690013	1.24552	0.355755	-0.227758	-0.0971137	-0.208966	1.83509	1.97185	1.29976	0.441066	0.409747	-0.0509068	1.11583	0.436588	0.120132	-0.0607204	-0.52576	-0.547697
1	2	2.66113	1.68652	-0.16992	-0.753892	-0.357111	-0.143479	2.06391	1.47822	0.627352	0.283949	0.0239746	0.0761409	1.40007	1.2024	1.07267	0.8603	0.16022	0.0243266	4.09064	2.89942	1.16156	0.394452	0.0498585	-0.147521	2.58738	2.82623	1.23213	0.818316	-0.0320203	-0.0318882	3.0663	1.75746	0.701012	-0.10714	0.0270671	-0.118775
1	2	2.12365	0.892923	0.0538685	0.226309	-0.120665	0.0449485	3.24548	1.94105	1.09189	0.661801	0.129744	0.125161	1.52959	1.36971	1.0263	0.479531	-0.154979	0.123476	4.85076	1.85074	1.39915	0.939122	0.142759	-0.229559	1.82024	0.958109	1.78578	1.32078	0.326508	0.2648	0.598236	-0.402326	0.11797	0.186329	-0.423659	-0.354131
2	1	0.56225	0.556893	-0.0637687	-0.223282	-0.113494	0.147067	1.07354	1.01176	0.5133	0.292925	-0.0325695	0.0640715	0.964236	1.14747	0.930973	0.389326	-0.0711181	-0.0291067	1.06483	1.09826	0.258771	0.0534385	0.00648286	0.183153	1.67671	1.37709	0.702038	0.338528	0.139175	0.130099	1.77516	1.29667	0.952431	0.620354	0.559608	0.0611459
2	1	2.52316	0.6525	0.454633	0.402181	0.104683	0.253452	1.63467	1.21824	1.04611	0.877491	0.332474	0.139298	1.24252	1.38372	0.702414	0.363766	-0.146561	-0.334998	2.61122	2.11323	0.832484	0.385842	0.0608804	-0.0385809	3.74334	2.81765	1.20621	0.456574	0.0180232	0.147476	1.94177	1.76867	1.11334	0.211823	-0.499868	-0.423486
2	1	2.06462	1.29775	0.730853	-0.0892604	-0.176707	-0.319642	1.16054	0.723969	0.844	0.641851	0.185601	0.410824	0.896597	0.293214	0.225529	-0.199859	-0.379801	0.0196577	1.15902	0.747376	0.677295	0.673561	0.481062	0.137716	1.46356	1.34605	1.11897	1.0019	0.505221	0.286229	1.52301	0.175899	0.31561	0.0736759	-0.0738738	-0.2168
2	1	0.230916	0.475603	0.144243	0.0426331	-0.205409	0.06406	2.12811	1.53411	0.742248	0.278842	-0.108178	-0.0974625	2.16269	2.59873	1.87054	0.658839	-0.132917	0.0265712	1.4144	1.41126	2.05981	1.26611	0.153439	-0.177794	2.38925	2.82363	4.40242	1.39006	0.238473	-0.00517379	3.61988	5.52917	3.2813	1.55778	0.320389	-0.186127
2	1	0.434246	0.286414	-0.163955	-0.00817793	-0.0357085	0.147316	1.81964	2.21063	1.12453	0.960152	0.709853	0.20848	1.15686	0.960493	1.40239	0.835916	0.360716	0.102081	0.315903	0.524753	-0.0223639	-0.224639	-0.216679	-0.00393275	1.65524	2.41988	1.27669	0.760458	0.481007	0.49174	1.06302	0.76605	1.01591	0.558342	-0.0134648	0.251509
2	1	0.885167	0.554987	0.627023	0.380047	0.220065	0.147534	1.57715	1.0758	1.11401	0.767542	0.541771	0.387171	1.16921	1.24541	1.31677	0.461513	0.175475	0.277821	1.84271	1.02054	0.610506	0.0404547	-0.0295983	0.0609273	1.95499	0.766034	0.871789	0.472203	0.160802	0.235886	1.16539	0.747213	0.594092	0.84873	0.204302	0.306673
2	1	1.67154	0.822039	0.115524	0.349131	0.0324592	-0.0461065	1.19294	1.44067	1.15789	1.3196	0.502974	0.252628	1.46501	1.52208	2.46664	1.40666	0.442281	0.125695	1.92157	1.19185	0.652359	0.610425	0.365039	0.171344	1.96928	1.5509	1.74801	1.5101	0.536029	0.228018	2.45593	2.52662	2.25915	1.88125	0.374156	0.503672
2	1	0.795367	0.239784	0.31592	0.101837	-0.18886	-0.0125971	1.12289	1.11651	1.25229	0.891213	0.27026	0.17564	1.95892	1.77005	1.4639	1.14787	0.495457	0.149846	0.782951	0.0558677	0.984535	0.300622	0.00450858	0.0250766	1.58821	1.3168	2.05447	1.0396	0.1374	0.367624	3.40948	4.59176	1.38501	1.41023	0.262085	0.207032
2	1	2.66386	1.44894	-0.035344	-0.562116	-0.29199	-0.0159934	3.61464	2.05897	1.60738	0.521514	-0.17416	0.0214763	0.246465	0.848013	1.09948	0.513688	0.129671	0.671572	1.83479	2.472	1.93064	0.973021	-0.196487	-0.232266	2.42514	1.40345	1.525	1.31137	0.0414267	0.147241	0.188745	-0.733207	0.356933	0.584238	0.210045	0.205826
2	1	2.53603	2.26956	1.85899	1.03753	0.1692	0.0779436	2.42723	1.87295	1.88081	2.4279	1.12943	0.361984	2.85658	1.86743	2.92912	1.95753	0.258898	0.256392	2.18701	3.13783	3.59661	1.83543	0.274581	-0.218776	4.57011	4.21139	3.69787	2.18701	0.873411	0.148394	4.62946	2.16393	2.14407	1.63676	0.580028	0.0593955
2	1	0.0321799	0.751939	0.500027	-0.0653939	-0.164667	-0.206309	1.34947	1.10911	0.996456	1.28054	0.676167	0.200404	2.42992	1.30309	1.19299	0.76553	0.361958	-0.155296	2.30953	1.65562	1.37013	0.828234	0.134325	-0.23566	3.22797	2.29089	1.91969	1.20501	0.499623	0.0723874	3.25653	2.54931	1.47881	0.894367	0.428465	0.212479
2	1	1.29964	1.53513	0.95553	-0.0737604	0.447802	0.204125	3.93596	1.17538	1.48656	0.875006	0.457299	0.258763	4.023	3.24287	2.67296	0.791835	0.0248155	-0.306051	3.26565	1.90615	1.38377	0.789039	0.379821	0.17686	3.21618	2.62604	2.13225	1.1898	0.474628	0.618169	1.91438	2.00272	2.58058	1.04898	-0.76856	-0.797074
2	1	0.819527	1.20971	1.05422	0.461513	-0.16792	-0.0437639	2.00403	1.58276	1.61411	0.779186	0.0759774	0.0827588	2.77328	1.00154	1.25059	0.697558	0.0563071	-0.0850614	2.24389	1.43999	1.3782	0.581863	0.12003	-0.0192847	2.37341	3.12372	1.76843	1.02877	0.497452	0.207404	1.95333	2.39155	1.769	0.939117	0.640688	0.576426
2	1	1.62914	-0.0310942	-0.112903	0.22245	-0.117613	0.0206322	2.48613	1.1205	1.07515	0.69012	0.207285	0.419392	1.1891	1.06809	0.816693	0.322921	-0.359374	-0.193324	1.64877	1.41853	0.149023	0.0713391	0.0131995	0.10054	1.48989	1.64827	1.23061	0.746135	0.216531	0.0881121	0.0176886	1.07312	0.514756	0.12327	-0.4203	-0.445094
2	1	0.796644	0.446547	-0.161854	0.114296	0.179823	0.273772	2.37325	2.40379	1.49618	0.306294	0.359832	0.500111	1.99692	1.96411	1.35826	0.893648	0.296012	0.485402	0.976362	0.710302	0.669477	0.380595	0.2323	0.111821	2.3687	1.37115	1.10095	1.4655	1.13399	0.321192	2.16954	1.50579	1.32951	0.931886	0.688059	0.417736
2	1	0.508538	0.687364	0.813064	0.338355	0.0974084	-0.0922349	1.57	2.14955	1.70458	0.38794	0.0957922	0.114191	2.20096	1.46821	0.635367	-0.045174	-0.407723	-0.184115	1.67749	0.547328	0.617838	0.571024	0.304344	0.0522704	3.17759	2.15881	2.14834	0.974553	0.124039	-0.0415178	1.17734	1.59242	1.9837	0.745476	-0.307209	-0.384042
2	1	2.85658	1.88018	1.14363	0.665791	0.326373	0.276333	3.97408	3.67832	2.89241	0.870039	0.0797236	0.0575261	2.41353	2.38796	1.46624	0.382738	0.219484	0.291649	1.66851	3.263	1.52909	1.12534	0.762906	0.285283	2.74139	3.36377	3.02433	1.8941	0.637	-0.0423076	2.20479	0.878523	1.60971	1.29808	0.441623	-0.00880714
2	1	0.839401	1.45467	0.666328	0.185267	-0.300088	-0.261159	1.28532	1.66863	1.20132	1.21271	0.0599386	0.0857919	0.575027	0.202344	-0.516368	0.237449	-0.552212	-0.410701	2.36103	2.09886	1.13981	0.0973306	0.0320658	0.0287614	1.95979	1.91215	1.65899	1.12031	0.0953014	0.0303459	1.97142	1.64604	0.799358	0.334859	-0.48846	-0.419538
2	1	0.490587	-0.123046	0.119566	0.190786	-0.0718571	-0.0134817	1.87834	1.49493	0.963435	0.534488	0.173399	0.182973	1.23469	1.37633	1.53288	0.561954	-0.231074	-0.0902529	1.82233	1.90402	1.19887	0.885235	0.167139	-0.0480992	2.28766	2.27194	2.02972	1.74639	0.528851	0.171095	2.52942	1.63112	1.6208	0.952992	0.179476	0.090744
2	1	1.15744	0.689575	0.8522	0.601764	0.142444	0.0401735	1.54867	1.87663	2.56707	2.04216	0.934445	0.416311	1.06836	0.524083	0.397169	-0.220218	-0.27156	-0.0434267	0.878861	1.13626	0.920294	0.608136	0.479488	0.00306524	2.00744	2.10448	3.80759	2.53158	1.1471	0.600705	3.78438	3.99111	3.5341	0.689736	-0.151887	0.219518
2	1	0.434841	0.697244	0.0658454	-0.0908077	-0.00577014	-0.0882671	1.54073	1.06718	0.572095	0.188217	0.00683585	-0.0557686	1.09975	0.812365	0.3856	0.00038375	-0.215589	-0.408971	0.936972	0.434948	0.821684	0.568906	0.210785	-0.00308356	2.2419	1.02095	1.11532	1.11514	0.292066	0.0313179	0.648964	0.634069	0.286043	0.0697947	-0.459339	-0.401591
2	1	0.217561	-0.64968	-0.680734	-0.404206	-0.248194	-0.160634	1.71607	1.45398	-0.0625729	-0.0655703	-0.0519576	-0.0391799	1.19143	1.03247	0.829084	0.151583	-0.117034	-0.171733	0.602833	0.154733	-0.0828326	-0.238938	-0.124546	-0.213703	2.30512	1.29946	0.817741	0.421766	0.0685591	-0.207785	0.619776	1.29672	1.42968	0.346166	-0.0481061	-0.230841
2	1	2.36538	1.4946	0.206422	0.257369	-0.185858	-0.398201	3.02335	4.23532	3.57014	2.25825	0.692516	0.172425	1.97295	1.24895	0.917835	-0.0772962	-0.444142	0.0124964	5.57967	3.40008	0.889651	0.10817	-0.170057	-0.271371	4.21009	2.4295	2.01939	0.999057	0.128398	-0.120584	0.911668	1.32921	1.57301	0.252133	-0.73489	0.0283224
2	1	0.435718	-0.156375	0.374193	0.93501	0.180707	-0.359372	2.15211	1.71545	3.34256	2.41256	0.533839	-0.0171768	1.38491	1.76106	2.86063	1.71192	0.200348	0.26288	0.333344	1.01441	0.885555	0.666112	-0.188272	-0.0505347	3.62187	2.53196	2.01414	0.953009	0.595636	0.0605891	2.48978	1.67731	1.52583	0.99313	0.414245	0.110512
2	2	0.972249	0.911315	0.553759	0.335233	0.131229	0.0445138	2.03359	1.96377	1.69327	1.19404	0.674848	0.178907	1.81409	1.34042	1.10892	0.466834	0.175014	0.148939	0.46134	0.161517	0.502169	0.824998	0.192914	-0.0267472	3.68634	2.11075	2.93286	1.48748	0.520528	-0.0935263	3.175	3.59529	3.73803	0.790363	0.959468	0.177172
2	2	2.30811	0.941968	-0.0822621	-0.154836	-0.194927	-0.159643	3.05014	3.71822	1.21527	0.426418	0.0470728	-0.0384858	1.882	1.97849	1.1086	0.696421	-0.0860008	-0.109769	1.64874	1.29783	0.714725	0.0709428	-0.136025	-0.142636	3.32943	2.69783	1.52587	0.417165	-0.204803	-0.099211	3.94807	2.69944	1.24763	0.357127	-0.362095	-0.0480714
2	2	0.179925	0.0551864	-0.00835717	-0.117438	-0.0533512	0.0930505	0.609389	0.449963	0.125885	0.0134411	-0.0789119	-0.0443455	0.213908	0.157589	0.188469	0.13477	-0.324341	-0.249462	0.231352	0.372717	0.507768	0.0962905	0.14122	0.0764647	0.627177	0.687648	0.566116	0.265031	0.174907	0.151228	0.521745	0.468078	0.268302	0.264977	0.3208	-0.0729996
2	2	0.264661	0.25799	-0.00238783	0.123962	0.275595	0.032798	0.363797	0.311699	0.319597	0.360471	0.112093	0.0458389	0.687946	0.356695	0.221859	0.246166	0.0652638	0.108752	0.773951	0.518793	0.366307	0.456965	0.0617482	-0.0868906	0.591632	0.203517	0.195475	0.369796	0.131934	0.0137869	0.270688	0.0626863	0.0764335	0.117473	-0.121773	-0.0217356
2	2	0.323626	0.3487	0.317149	0.455432	0.13201	-0.122091	4.98768	2.64774	1.35787	0.626632	0.226853	0.00957196	2.77489	1.43428	1.59406	-0.0398321	-0.157454	0.265326	1.2145	0.190672	1.16227	0.468492	0.1934	-0.0852049	3.27921	3.30329	3.26299	0.966759	0.324341	0.283715	2.3763	2.51925	1.35437	-0.0758671	0.0494302	0.386753
2	2	1.22874	1.28939	1.06137	0.500462	0.175034	0.345368	2.53778	2.36358	1.7406	0.815395	0.0773108	0.131854	3.75059	1.75877	1.52551	1.05417	-0.283521	-0.172733	2.22028	2.12375	1.45371	0.829334	0.163768	0.285464	3.50074	2.84688	3.02581	0.994892	0.119196	0.154532	2.54826	1.73576	2.15352	0.562156	-0.237213	0.0371145
2	2	1.71765	0.755385	0.261916	-0.0102769	0.0133786	-0.0018738	1.98125	0.844441	0.58161	0.295482	-0.0343405	0.092458	1.9797	0.557828	0.262847	-0.203622	-0.39387	0.0354494	2.07986	1.96812	0.749139	0.246469	0.107502	-0.0122499	2.22219	1.49289	1.2168	0.511344	0.10087	0.153478	2.6957	1.1563	0.627582	0.0392191	-0.66765	-0.152075
2	2	0.697528	0.378354	0.183649	0.267519	-0.149017	-0.0153934	0.771999	0.373654	0.833478	0.453222	-0.137094	-0.0493549	1.20419	0.210325	0.256926	-0.0697002	-0.210877	-0.0758735	0.54984	0.36133	0.376054	0.245111	0.057194	-0.159887	0.552564	0.755971	1.09077	0.4603	-0.0726418	-0.0425016	1.91784	1.41954	1.13055	-0.0682892	-0.389272	-0.0861933
2	2	1.08178	1.16337	0.383916	0.15636	0.339779	-0.0435603	2.3076	1.86578	1.68391	1.04056	0.107986	-0.270061	2.07981	1.48774	1.03192	0.583413	-0.112048	-0.511535	2.7501	1.44318	1.03916	0.147503	0.0317457	-0.131792	3.44984	2.54602	2.70534	1.0244	0.301282	-0.105912	5.42213	1.59642	2.26393	1.4479	0.304823	-0.192577
2	2	3.13699	1.32968	0.787793	0.191524	-0.31835	-0.0613591	5.23456	1.95671	2.06511	1.88645	0.8295	0.32952	3.59214	2.44137	1.5446	1.12541	0.218977	0.210697	2.01274	2.86475	1.44371	0.394744	0.18575	0.00446317	3.33807	4.25736	1.99533	1.34662	0.770573	0.306969	5.90597	1.53963	1.19152	0.679812	0.477657	0.280798
2	2	1.0036	0.659131	0.372047	0.190058	-0.130596	0.121828	1.35537	0.788563	0.826453	0.793869	0.0566287	-0.0428213	0.729562	0.393719	0.757311	0.529848	-0.0329774	-0.0930842	1.3966	0.950568	0.48625	-0.22278	-0.349832	-0.201858	1.45349	1.2474	0.675063	0.263193	-0.130369	-0.160504	0.999134	0.228677	0.500864	0.288985	-0.189616	-0.223491
2	2	1.55579	0.889349	0.505115	0.30248	0.51001	-0.184758	0.935457	1.14643	1.55757	1.61592	0.648728	-0.0557918	0.167954	-0.00082599	-0.0236637	-0.0162434	-0.0227848	-0.176397	2.63448	2.07217	1.38286	0.778652	0.367057	-0.0398576	2.74454	1.30563	2.38044	1.57563	0.53387	0.115404	1.82061	0.155869	0.597039	0.104479	-0.274449	0.0722051
2	2	1.69868	0.760451	0.631405	0.694157	0.254163	0.0604132	2.28684	1.68601	1.22956	1.0687	0.38375	0.0655119	2.91173	1.92071	1.24683	0.482696	0.0865633	0.153285	1.7175	0.971268	0.424742	0.742887	0.171949	0.0128389	2.21576	0.935642	1.2197	1.09363	0.12985	0.1034	1.02579	0.769794	0.828102	0.14422	-0.103177	0.163163
2	2	0.144932	0.176379	0.0561107	-0.091846	-0.0955181	-0.196155	1.00265	0.649985	0.447498	0.257879	0.197523	0.0420434	1.47457	0.72245	0.621497	0.273183	-0.138774	-0.0769587	1.07896	0.626292	0.174936	0.108201	-0.128806	-0.314908	1.37495	1.45819	0.759282	0.470909	-0.119834	-0.132526	0.553518	0.376349	0.320025	0.0731152	-0.703482	-0.225301
2	2	1.56924	0.772505	0.448865	0.833907	0.13233	0.130296	3.25668	2.11168	1.06955	1.54228	0.770359	0.20468	2.9375	1.6029	0.968531	0.620984	-0.192067	-0.0322288	2.81926	1.7009	1.05839	0.386305	-0.0221968	-0.152021	2.20838	2.21337	1.34228	0.880644	0.29507	0.111249	1.92483	1.57278	0.922946	0.632643	-0.106881	-0.16321
2	2	1.26158	0.642725	0.163967	-0.048802	-0.153231	-0.110632	0.775319	1.03287	0.665865	0.754059	0.283539	0.0573695	-0.945977	-0.270367	0.499544	0.495331	-0.096152	0.0403702	0.948576	0.788151	0.850673	0.450688	-0.00321681	-0.0414428	1.77124	1.30993	1.41069	1.08388	0.270186	-0.0559839	0.45996	0.665065	0.664363	0.820144	0.458266	-0.104145
2	2	1.4408	0.910437	0.791254	0.459982	0.19519	0.00378083	2.58338	1.76971	1.11227	1.05762	0.6057	0.0241275	2.21115	0.962315	0.878368	0.376833	-0.277701	-0.286148	1.00758	2.00087	1.40028	1.26701	0.265281	0.000820523	2.60734	2.36563	2.25763	1.08807	0.148751	-0.130889	2.94758	3.16746	1.24733	0.204409	-0.521954	-0.00473482
2	2	2.07222	0.180168	0.464043	0.101946	-0.0266795	-0.0313395	3.03732	2.06818	2.39311	1.47303	0.487406	0.310938	1.03758	1.2431	0.686124	0.22127	-0.661941	-0.53171	1.79831	0.403543	0.156618	0.209469	0.102312	0.0371979	1.98564	2.05097	1.43732	0.476912	0.22807	-0.130957	0.929721	1.23377	0.56372	-0.168473	-0.248357	-0.46144
2	2	0.562544	0.112032	0.235304	0.0637908	0.113623	0.136646	1.77505	0.908684	0.44537	0.317819	0.283513	0.0464606	0.966523	0.0383371	-0.325941	0.287337	0.35215	0.0736466	1.26412	0.545696	0.0491377	-0.084753	-0.0468182	0.104205	1.84974	0.639013	0.693643	0.429489	0.150358	0.0560419	1.0182	0.368824	0.822925	0.487586	0.032154	-0.0399737
2	2	2.50932	2.77189	1.53385	0.345315	-0.0294615	0.122672	2.98923	3.38225	1.40228	0.722428	0.349971	0.415282	2.132	1.43024	1.57254	1.63635	0.332428	0.543181	5.4165	5.07159	2.52458	0.603033	0.0240726	0.179548	2.86286	1.99358	1.53892	0.838497	1.61546	1.32226	1.94723	1.06185	2.01421	1.09447	0.31554	0.0359344
2	2	0.793634	-0.242387	-0.457499	-0.364211	-0.212337	-0.194147	1.51799	0.971189	0.815259	0.565187	0.21933	0.226324	1.07982	0.870387	0.931374	0.532596	-0.462431	-0.12005	1.09425	0.459662	-0.661226	-0.11514	-0.235883	-0.23014	1.68668	1.00063	1.37169	0.51075	-0.10602	-0.0978517	1.0891	0.274973	1.08609	0.816327	-0.615553	-0.430911
2	2	0.186809	0.124449	-0.0833602	-0.215794	-0.118911	-0.129552	1.98561	2.43082	1.62576	0.623468	-0.00884083	-0.0230093	3.01559	1.16278	0.981737	0.459451	-0.149362	-0.0408798	0.705629	0.228331	0.509001	0.542762	-0.0286245	-0.155729	1.5044	1.97177	1.68681	0.561581	-0.114163	0.00322666	3.23634	2.58862	1.00562	0.189373	-0.415066	-0.0788649
2	2	0.361313	0.40748	0.442035	0.329876	-0.0272462	-0.136471	1.32673	0.292601	1.11276	0.914488	0.261311	0.137307	1.28864	0.60516	1.46611	1.23859	0.318103	0.0484675	0.769945	-0.0635292	0.011891	0.135061	0.189775	-0.0584442	2.12744	1.48479	0.932686	0.705755	0.415258	0.0700762	2.05643	0.94633	1.3187	1.98037	0.701781	0.148524
2	2	2.92513	0.944657	0.379809	-0.0689902	-0.144638	-0.204765	0.692234	0.907468	0.845164	0.923415	0.341421	0.0950408	0.0675585	-0.0054925	-0.182142	0.0902623	-0.182504	-0.0205182	1.434	1.74014	0.744101	0.232728	0.0838457	-0.0607305	2.04776	3.30437	1.85579	0.830477	0.329395	0.316602	2.42162	1.82218	1.19783	0.486314	0.0242455	0.169033

## Sheet: Houses
language	dyslexia	-48-73-16	-48-64-16	-48-55-16	-48-46-16	-48-37-16	-48-28-16	-39-73-16	-39-64-16	-39-55-16	-39-46-16	-39-37-16	-39-28-16	-30-73-16	-30-64-16	-30-55-16	-30-46-16	-30-37-16	-30-28-16	48-73-16	48-64-16	48-55-16	48-46-16	48-37-16	48-28-16	39-73-16	39-64-16	39-55-16	39-46-16	39-37-16	39-28-16	30-73-16	30-64-16	30-55-16	30-46-16	30-37-16	30-28-16
1	1	2.01033	1.05969	0.592407	0.554203	0.355107	0.201593	2.39021	0.840385	1.01732	1.04794	0.25486	0.135265	2.23735	2.26881	2.54228	1.16946	0.652082	0.377795	2.24143	2.10973	1.08543	0.662819	0.149656	0.198697	3.4087	2.20202	1.29629	0.940453	0.762871	0.570174	2.47014	1.87164	1.51487	1.36611	1.1896	0.520386
1	1	-0.0869252	-0.176526	-0.511758	-0.129909	-0.41851	-0.347221	1.16517	1.11911	0.5546	0.40816	-0.0525513	-0.131766	1.45307	2.10465	1.06258	1.34824	0.50712	-0.232274	1.43065	1.56615	0.646159	-0.259682	-0.352966	-0.125601	3.93239	1.85134	1.18112	0.287125	-0.139409	-0.20556	2.37365	0.777119	2.09568	1.78296	1.08536	-0.0733339
1	1	0.60355	0.601395	0.0740286	-0.261553	-0.141226	-0.175092	2.07138	1.21135	0.903705	0.6594	0.18877	0.108266	2.54909	2.10211	2.21116	1.57191	0.609119	0.5495	2.63887	2.64286	1.79399	0.427786	-0.0506234	-0.314712	5.11502	3.92783	2.54533	1.39697	0.638658	0.060996	4.48869	2.6462	1.30363	2.17816	1.26266	0.184555
1	1	0.986598	1.59688	0.460283	0.0563745	-0.178748	-0.256775	3.31792	2.69452	2.33205	1.09976	-0.0128699	-0.300938	2.71049	0.818753	1.35935	0.5212	-0.297514	-0.200426	1.53816	1.8237	1.97172	0.393688	-0.0562604	-0.0804592	2.54612	2.33926	2.94546	1.30332	-0.248605	-0.121927	1.43992	0.560753	1.98185	1.5801	-0.393928	-0.251
1	1	0.846135	0.738267	0.814728	0.325294	0.244472	0.0918522	3.10801	1.74548	1.17113	0.775299	0.193887	0.298928	2.73865	2.14843	2.13857	1.01107	0.0631371	0.355534	3.01488	2.14905	0.834767	0.805824	0.498663	0.32448	2.47886	1.98199	2.19727	2.18764	0.830758	0.703828	3.41232	3.39014	2.66224	1.4674	0.55203	0.61834
1	1	1.31866	1.52345	0.806921	0.319098	-0.180543	-0.109711	1.66656	1.06984	0.886279	0.235876	-0.110678	-0.0509528	1.21638	1.46646	1.42489	0.764356	0.140197	-0.0824893	0.616633	2.00197	0.704084	-0.167447	-0.413222	-0.126648	2.62496	2.08611	1.71161	0.407523	-0.227817	-0.0171735	5.62475	1.6191	1.41753	0.522255	0.32004	0.185519
1	1	2.54849	2.00901	0.337002	-0.0541316	0.0452831	-0.132219	5.20322	4.77678	2.22714	0.497268	-0.058009	0.345939	6.44882	3.7627	3.26148	2.57946	0.341066	0.282338	1.09216	2.40281	2.43599	0.0423432	0.106661	-0.0584359	2.81593	2.00579	1.95382	1.59312	0.73333	0.295778	5.42135	2.2197	2.0429	1.78294	1.07976	0.36283
1	1	0.365956	0.215181	-0.420641	-0.460992	0.507534	0.447681	0.741834	-0.0259805	-0.369441	-0.366114	0.0650069	0.766094	0.289149	0.0976788	-0.0565191	0.449819	0.111292	-0.0414892	0.942389	0.0469489	0.040215	0.5498	0.421359	0.241361	0.892815	0.641996	-0.451256	0.463537	0.706877	0.64351	1.2583	0.371313	0.548908	0.574188	0.306742	0.30197
1	1	0.398554	-0.441079	0.133591	0.318603	0.439427	-0.0753272	2.21818	0.613127	0.865922	0.579569	0.37047	0.342862	2.52232	0.379102	0.546064	1.36944	0.578995	0.0963934	0.0656664	1.73307	-0.0322343	0.0430644	-0.16423	-0.434149	3.121	2.83254	1.99872	0.996722	0.641285	0.252611	2.37452	1.5574	1.09496	0.814729	0.374731	0.189873
1	1	1.09659	0.197614	-0.567304	-0.616874	-0.266662	-0.192772	1.59256	0.218888	0.395131	0.0416303	0.171452	-0.00343354	1.84863	1.35191	1.30792	1.05403	-0.0129265	-0.123481	2.28826	2.55346	2.06028	0.515888	-0.0272934	-0.183125	4.23769	3.02696	2.121	1.23881	0.591094	0.264058	2.39317	2.3072	2.31161	1.33098	1.75976	0.441729
1	1	0.469374	1.10383	0.218205	-0.0541054	-0.0550959	-0.0838164	1.87139	2.09261	2.02565	0.625825	0.0492803	0.164319	2.72487	2.83764	0.926695	0.521833	0.000262895	0.0867204	0.477257	1.16497	1.18688	0.254624	-0.02024	-0.329123	0.962508	1.40997	0.898754	0.80551	0.117567	0.0623662	1.31014	1.04445	0.539865	0.699827	0.405832	0.142538
1	1	0.200381	1.10462	0.0382663	-0.168341	-0.244799	-0.315483	1.51923	1.81	0.818265	0.147772	0.148098	-0.140336	0.987489	3.2081	1.56166	0.667854	-0.107777	-0.253049	2.30685	1.89509	0.735882	0.244699	-0.263733	-0.319116	3.1614	0.97516	1.90299	1.0128	0.209016	-0.103778	3.48836	1.67053	1.94468	1.20305	-0.0803634	-0.453776
1	1	0.517535	0.987193	0.820063	0.78669	0.036909	-0.0470514	1.64673	1.61217	0.864937	0.570221	-0.0693456	-0.145325	1.88345	1.59264	1.58452	0.945608	0.549078	0.103127	1.37317	1.54682	1.31733	0.896337	0.129422	-0.172214	2.12123	1.98802	0.861196	0.677814	0.447177	-0.0955201	1.35805	1.92905	1.25503	1.93262	1.44066	0.203949
1	1	0.214173	0.488646	0.426332	-0.0722271	-0.430458	-0.237679	1.91201	1.92546	1.39715	0.655207	-0.210904	-0.188382	2.0555	2.00152	1.75289	0.894451	-0.306152	-0.317173	0.60782	1.6611	1.57329	0.122567	0.0208913	-0.403168	1.72353	2.24803	1.41949	0.686214	-0.0128797	-0.224149	3.08484	2.78278	1.32482	0.926009	0.513571	-0.0296754
1	1	1.54401	0.504745	-0.423231	-0.24665	-0.139883	0.177628	2.26742	1.059	0.189119	-0.00122146	-0.0761944	-0.11106	1.97171	1.26133	0.54079	0.0701831	-0.508476	-0.312568	3.28105	1.75527	0.582242	-0.153235	-0.114049	-0.134103	2.99971	2.0635	1.01034	0.669165	-0.0104786	-0.102646	2.2069	1.4139	1.1744	1.21948	0.295307	-0.452127
1	1	2.67879	2.01552	0.656246	0.462074	0.263926	0.0134927	2.85806	1.93035	0.609996	0.325682	0.323278	0.207125	2.31257	2.09288	1.03776	0.903921	0.80777	0.165097	2.54717	1.97491	0.643899	0.916753	0.413992	-0.05628	2.94515	2.1013	1.20645	0.651378	0.478364	0.55591	2.80974	1.6004	1.37045	1.91432	1.08616	0.552429
1	1	2.59453	0.735848	0.0494032	0.218079	0.150241	0.0163514	2.721	0.877796	0.687926	0.454012	0.043259	0.00561775	2.28333	1.22274	1.47578	0.954127	0.160595	-0.22871	1.24326	1.11634	0.637467	0.582741	-0.0271973	-0.0201006	2.0297	1.48172	1.27836	0.824285	0.453684	-0.0850734	2.34183	1.71937	2.15449	1.14417	0.672136	-0.184903
1	1	2.17761	1.0656	0.408708	0.313758	-0.0261394	-0.194565	2.6549	1.13469	0.732641	0.232744	-0.00802643	-0.126119	2.48258	1.24868	0.916491	0.611709	0.285402	0.0292059	2.13286	2.50712	0.987581	0.582788	0.224294	0.00147462	2.9813	2.17623	0.979503	0.69399	0.2532	0.0605953	1.82087	1.6839	1.37697	0.883624	0.322868	-0.0760753
1	1	-0.273659	0.0934151	0.238603	0.0789305	-0.491529	-0.304793	0.757008	0.794753	0.714156	0.600344	0.356253	0.187209	1.37626	1.17507	1.17658	0.758585	0.473615	-0.0802978	-0.355132	0.383904	0.707128	0.602279	0.404416	0.269204	0.560206	0.442677	0.819849	0.660387	0.564972	0.71743	1.65628	1.08574	1.103	0.771867	0.355629	0.331294
1	1	2.65565	1.1713	0.888558	-0.26259	-0.197975	-0.124463	1.89935	0.668901	0.593522	0.443855	0.0913445	0.189815	-0.0931923	0.849322	1.00465	0.968205	0.338169	0.174195	4.25197	2.16869	1.07706	0.664874	0.41558	0.199249	3.24861	1.95735	1.47885	0.795601	0.170474	0.0628707	1.48784	2.10232	1.74118	0.866265	0.574723	0.238659
1	1	2.2565	2.98009	2.20192	1.15318	0.503117	0.10018	2.41214	2.33051	1.83398	1.83509	0.759185	0.133846	3.76865	3.53709	2.06825	1.11974	0.235647	0.0150285	4.10525	4.13645	1.7916	1.31697	0.303158	-0.0107706	2.17264	4.10509	2.8839	1.65017	0.911955	0.428376	3.50165	3.79096	2.65766	2.39422	1.31858	0.559633
1	1	-0.402457	0.0266677	-0.0507686	0.0820782	-0.106851	-0.134963	1.09326	0.104073	0.208892	0.380121	-0.215538	-0.22563	0.691174	0.396733	0.873474	0.545761	0.223682	0.146151	1.15831	0.388043	0.476338	0.129436	-0.344761	-0.220411	3.27466	2.06775	1.68727	0.820913	-0.167519	-0.12031	3.66749	0.58853	1.23258	1.25798	0.231283	0.0287071
1	1	1.77877	1.11218	0.340142	0.201375	0.239481	0.0463838	2.88446	1.59599	0.61417	0.371182	0.18365	0.056334	3.14752	1.75263	0.913355	0.411919	0.120749	0.0585651	2.03631	1.69306	0.87772	0.79976	-0.0448531	-0.10938	2.20517	1.98457	1.23456	0.687487	0.200204	0.032039	2.15916	0.642014	0.370141	0.83718	0.267981	-0.107357
1	1	2.09054	1.28279	0.640984	0.46128	-0.0171768	-0.106075	2.15966	1.8699	1.49428	0.560629	0.117837	0.174067	1.95731	1.23262	1.50654	0.773183	0.703081	0.371083	2.15488	1.72883	0.173161	-0.398143	-0.825506	-0.413853	2.43624	1.97796	1.19955	0.627767	-0.260535	-0.368798	1.70818	1.73671	1.95648	1.01596	0.420854	-0.0159261
1	2	0.806305	0.213104	-0.0854155	-0.277816	-0.134285	-0.0988883	0.608524	0.459685	0.2121	0.0604185	-0.0986946	-0.0742149	0.947829	-0.0115419	-0.296539	-0.251938	-0.155394	-0.204515	0.419533	0.372276	-0.256502	-0.608042	-0.392257	-0.214381	0.0705621	0.0526914	-0.377674	-0.339912	-0.0899403	-0.505563	0.846511	-0.245536	-0.904732	-0.874355	-0.37843	-0.366327
1	2	0.950355	1.53141	0.634513	0.206292	0.263407	0.233007	2.30133	1.17208	0.666605	0.71023	0.162652	-0.080395	1.32408	0.360086	0.217201	0.0169714	-0.118756	-0.229492	1.22064	2.16211	1.45845	0.780958	0.404624	0.28203	2.37023	1.08269	1.99652	1.51582	0.360121	0.219516	1.29913	-0.0199953	0.2665	0.564056	0.0110527	0.270878
1	2	0.287734	-0.0122569	-0.43563	-0.653737	-0.287839	-0.24258	1.92495	1.26765	0.861975	0.207032	-0.216707	-0.0653953	1.55996	1.556	1.12239	0.620418	-0.0076818	0.0080485	1.26239	1.20137	0.610997	-0.0340336	-0.330879	-0.20677	2.34437	1.31768	0.822956	0.307671	-0.284615	-0.0760765	1.64821	2.42575	0.83441	0.28056	0.467652	-0.00667023
1	2	0.0806974	1.05509	0.521581	0.0971198	-0.191016	-0.0231134	2.23524	1.05326	0.64905	0.340724	0.126464	-0.045758	1.78861	1.31537	0.587884	0.567896	-0.0610137	-0.12572	1.80774	1.49321	0.649274	0.0969039	-0.244694	-0.0483648	1.54671	0.721687	0.447662	0.401667	-0.075919	-0.220262	0.272332	0.200687	0.135104	0.25881	0.235608	-0.241135
1	2	2.01781	1.86993	0.496291	0.540404	0.162131	-0.0614946	3.14698	2.07859	1.02704	0.913922	0.439658	0.206074	5.15414	4.05043	1.86247	1.99471	1.22239	0.517642	1.56383	2.68049	3.4855	1.05138	0.44376	0.227203	3.56341	2.28601	2.96137	3.21262	1.28627	1.02953	2.65784	2.89622	3.82078	2.73443	1.72137	0.957488
1	2	1.78671	1.10518	0.769788	-0.0638568	-0.232275	0.161592	2.28144	1.40858	0.851446	0.541998	0.196947	0.116799	1.76824	1.34582	1.2179	1.28614	0.724065	0.594291	0.884298	1.35226	0.719979	0.199204	0.250526	-0.059825	0.871673	1.35523	0.830825	0.465581	0.53596	0.452629	1.2486	1.13378	0.997002	0.850001	0.383404	0.259984
1	2	0.400943	0.303183	0.0549125	-0.288916	0.0199176	0.168982	1.42615	0.349246	0.883685	0.536057	0.398896	0.0667428	1.45129	0.502068	0.314785	0.884235	0.861101	0.350676	1.0671	0.529654	0.238086	-0.0964831	0.147367	0.14198	1.46208	0.868667	0.808071	0.41465	0.239114	0.403842	4.46847	-0.0836773	0.356368	1.12808	0.563508	0.393592
1	2	1.58231	1.25116	0.618252	0.15962	0.249502	-0.143389	2.52704	1.55213	0.839455	0.152575	0.374144	0.0407788	0.957734	1.22497	0.885904	0.922879	0.00746675	-0.436648	1.92542	1.75942	1.16665	0.250248	0.227847	0.170931	1.67439	1.2471	1.99969	0.890074	0.344567	0.0698183	0.976498	1.09931	1.77848	0.946676	0.969079	0.373088
1	2	1.67303	0.479812	-0.296305	-0.290805	-0.400806	-0.257466	2.57189	0.63097	0.276265	-0.0450637	-0.390823	-0.277408	-0.20802	0.70859	1.33227	0.595987	0.277919	0.0196529	2.89871	1.30411	0.61152	-0.262645	-0.467725	-0.373788	2.55006	1.35706	1.89904	0.804823	0.211341	-0.208687	1.11717	1.08694	1.80471	1.06827	0.842772	-0.0765084
1	2	-0.365732	-0.218471	-0.251754	-0.133629	-0.020561	-0.0291008	0.136776	0.0831376	0.0637356	-0.0765036	-0.0633573	0.112384	0.26163	0.247072	0.437392	0.513641	0.206039	0.268296	-0.131713	-0.213219	-0.180408	-0.183902	-0.174771	-0.0321183	0.0854054	-0.118247	0.208147	0.349902	0.312378	0.354983	0.0088661	-0.00244625	0.513707	0.823386	0.696932	0.516737
1	2	0.653031	1.26925	1.30976	0.849434	0.472309	0.216718	1.82194	0.851839	1.48404	0.636062	0.352153	0.0869438	1.12558	0.977515	1.08528	0.898281	0.414029	0.501774	3.74842	3.21709	1.79402	0.94068	0.235481	-0.0260144	3.34062	2.67054	0.830406	0.42541	0.143647	0.0218382	2.63328	2.25861	0.866937	0.534834	0.452716	0.51381
1	2	0.464622	0.0410781	0.18103	-0.0336148	0.00784418	0.237072	1.11189	1.22677	0.715982	0.394715	0.504521	0.506589	1.34818	0.735168	0.732998	1.27423	0.876122	0.533936	1.66796	0.944677	-0.096166	-0.0470044	0.0750099	0.0759333	1.25109	1.90336	1.0988	0.577263	0.661333	0.479038	3.48129	0.995254	2.02832	1.75307	0.908021	1.21977
1	2	3.31137	1.98705	0.768241	-0.63662	-0.0900216	0.103648	2.72823	1.88303	1.39594	0.257383	0.0236453	0.0767912	2.00903	1.98945	0.498584	-0.0273368	-0.377035	-0.302852	4.09743	2.39747	1.31344	-0.2485	-0.264177	0.118509	2.85423	2.2424	0.954458	0.226008	-0.00382817	-0.0241011	3.96753	1.27056	0.345198	0.299007	-0.0435933	-0.493626
1	2	1.87062	0.897812	0.0105106	-0.367368	-0.0253442	-0.00482358	3.39263	2.03533	1.07161	0.142662	-0.0313088	-0.0347485	2.02307	2.05217	1.49168	0.612011	-0.500018	-0.414088	4.26983	2.87044	1.37408	0.457619	0.058268	0.0413075	1.78015	2.36743	1.26497	0.973706	0.154658	0.127366	2.02864	2.36624	0.8352	0.698627	0.580123	-0.215388
1	2	2.33744	1.36406	0.596668	0.231686	-0.129914	-0.154853	1.67033	1.15631	0.748863	0.0574261	0.160621	0.0831864	2.42838	1.70075	1.2515	0.992369	0.455163	0.210724	1.16608	2.4837	1.7214	1.13851	0.26861	-0.0689135	2.50639	3.29106	1.67055	1.20688	0.975129	0.204928	3.69348	1.66395	0.690055	1.42244	1.15768	0.701381
1	2	0.382329	-0.197255	0.151162	0.534955	0.136381	-0.249415	1.1021	0.819059	0.393302	0.416221	0.11926	-0.226782	2.66488	1.31016	1.49951	0.743292	0.248078	-0.0680126	-0.234297	0.438816	0.542131	0.107487	-0.11073	-0.321422	1.51923	0.747923	0.836968	0.753793	0.494535	0.188104	2.39261	1.41947	2.0757	1.66709	1.05954	0.797402
1	2	1.36726	0.699767	0.251359	0.0907525	0.0760395	0.153213	2.10582	0.906042	0.123922	0.640853	0.617231	0.440251	1.66641	0.862444	0.867574	0.799062	0.381128	0.146518	1.42486	1.80566	0.623236	0.232319	0.192691	-0.0440818	1.59007	1.23817	0.769036	0.710021	0.3239	0.108898	1.8877	1.07648	0.77228	1.57842	0.449138	0.483177
1	2	2.21157	0.841768	0.525921	0.157782	-0.06424	-0.333045	2.01567	1.66237	0.628793	0.298774	-0.000773402	0.220997	1.8288	1.63689	0.499728	0.224415	-0.221243	0.173098	4.21283	3.19059	1.68837	0.753463	-0.0296881	-0.0776991	4.79891	2.23637	1.10742	0.886019	0.278605	0.235393	4.14829	2.0829	1.25737	1.33235	0.895996	0.102871
1	2	1.45077	1.96641	1.26021	0.624772	0.614739	0.207226	1.77006	2.47013	2.23673	1.45723	0.699727	0.375929	2.68639	1.81559	1.107	0.836128	0.364235	0.452092	1.48273	2.37957	1.64851	1.04672	0.86825	0.139849	4.90375	2.31723	1.61753	1.09042	0.617535	0.394604	1.70027	-0.590456	-0.216069	0.155598	0.37845	0.212425
1	2	-0.982165	-1.59349	-0.495537	0.148731	0.366496	0.103587	0.748189	0.28529	-0.166445	0.700321	0.315298	0.246091	0.889347	0.0838648	0.25304	-0.0193367	-0.468828	-0.586374	0.279382	-0.176534	-0.151283	-0.317909	-0.521957	-0.243477	0.409914	0.581781	0.536716	0.370868	0.0829523	0.007347	0.328104	0.473553	0.376321	-0.0710616	-0.343998	-0.263279
1	2	1.77593	1.0776	0.178359	0.0360267	-0.0744348	-0.136503	1.22127	0.674627	0.466235	0.0120367	-0.141189	-0.118327	0.777281	0.85402	0.656744	0.296216	0.212253	-0.035695	0.66313	0.85271	0.739953	0.579977	0.0329079	-0.0631489	1.85092	1.21284	0.895962	0.276034	0.0470515	-0.0319532	1.22742	1.16252	1.46351	0.501375	0.275968	0.0670121
1	2	1.35345	-0.0547471	0.0452761	-0.0842995	-0.0399714	-0.223434	2.39148	0.735008	0.142903	0.427234	0.386789	0.221933	1.07769	1.0473	1.2686	0.548536	0.342226	0.192065	0.635827	0.455238	-0.0565684	-0.316502	-0.494396	-0.226201	1.96167	1.79892	1.05369	0.306145	-0.0555779	0.284161	2.11616	0.846169	0.84718	0.294174	0.114705	0.0169244
1	2	2.62353	0.695671	-0.115134	-0.191534	-0.145568	-0.113579	1.48119	1.11323	0.0627311	-0.0583258	-0.208272	0.102818	1.5969	0.831234	0.67528	0.530125	0.108886	-0.0864001	3.61368	0.929942	-0.276458	-0.125429	-0.375652	-0.107318	2.3474	1.75927	0.954732	0.47974	0.0632234	0.383751	2.53615	1.45593	1.33844	0.557509	0.211525	-0.111777
1	2	2.25424	1.43542	0.605833	0.0424503	0.098584	0.212651	3.58773	1.83834	0.940732	0.440191	0.403744	0.271959	2.78235	1.61677	1.1866	0.562565	0.287196	0.129997	5.86159	2.97759	1.69502	0.214668	-0.311956	-0.204585	3.29716	1.82199	1.35866	1.12528	0.27183	0.373321	1.74275	1.25469	1.14519	1.24847	0.509434	0.00955476
2	1	0.197842	-0.14069	-0.0998343	-0.418165	-0.652759	-0.224489	0.577076	0.544472	0.157982	0.112382	-0.211277	-0.234116	1.06315	1.07305	0.715612	0.447882	-0.279676	-0.149048	0.3502	0.431092	0.106235	-0.282569	-0.229433	-0.367147	1.5719	0.540836	0.0409086	0.189405	0.100892	-0.0361504	2.3029	0.836824	0.830522	0.878976	0.538514	0.0895617
2	1	2.31472	0.801214	0.249966	0.00955447	-0.102438	0.378652	2.15689	1.26145	0.519584	0.327941	0.0890658	0.112774	2.03374	1.76426	0.821856	0.502351	0.000405738	-0.278153	2.21083	1.51685	0.183432	-0.0797102	0.273494	-0.0210664	3.89977	2.41372	0.784596	0.380045	0.0569719	0.100206	2.06355	1.9973	1.48948	0.510737	-0.124378	-0.115441
2	1	1.90354	1.06411	0.287264	-0.049234	-0.116682	-0.156549	1.36033	0.898516	1.15196	1.21897	0.55197	0.429305	2.3775	1.25527	1.61662	0.750965	0.149368	0.113393	1.18439	0.987891	1.20278	0.648966	0.492001	0.222308	2.06133	1.5752	1.73954	1.43117	0.813851	0.23536	2.40266	0.964283	2.19128	1.36162	0.764655	0.216107
2	1	0.393782	0.297813	0.0237849	0.106457	-0.184994	-0.126231	1.21075	0.718875	0.0693651	-0.0463374	-0.0296129	-0.0828754	1.65735	1.74632	0.879158	0.365826	0.13271	0.0589461	1.06592	0.777616	1.10556	0.605055	0.0351209	-0.178335	1.72097	1.87697	2.01488	0.446724	0.103266	-0.0724664	3.07122	4.38167	2.12543	1.29539	1.00865	0.0566842
2	1	0.230056	-0.34258	-0.582572	-0.256471	-0.189475	0.00499637	1.49942	1.28436	0.141694	0.117662	0.237127	0.119294	1.10193	0.727866	0.963174	0.685221	0.421214	0.110597	0.28917	-0.0171383	-0.527019	-0.657604	-0.438909	-0.123732	0.872574	1.0816	0.523022	0.415356	0.47576	0.303198	1.27565	0.771888	0.820298	0.591008	0.61653	0.324603
2	1	0.211825	0.195898	0.157355	0.164014	0.197997	0.153375	1.35534	1.05458	0.880094	0.302024	0.0717564	0.0394744	1.78042	1.31438	1.54289	0.708041	0.48117	0.0844909	1.66673	0.66789	0.34918	0.191446	0.0391748	0.117086	2.02733	1.37872	1.02688	0.530473	0.162689	0.101629	1.65396	2.00764	1.10695	0.972133	0.337066	0.413492
2	1	1.25321	0.160643	-0.0418352	0.145934	-0.281194	-0.537432	1.08109	0.801206	0.254695	0.49652	0.162768	-0.153441	1.57655	1.41206	1.69455	1.18884	0.720243	-0.131155	1.46386	1.0526	0.765192	0.595872	0.15026	-0.119029	1.94806	1.521	1.12497	1.10469	0.630087	0.218394	2.58814	2.16356	1.71173	2.09901	1.09459	0.208545
2	1	0.0289234	-0.556691	-0.576357	-0.288518	-0.120892	-0.0870113	-0.058424	0.0334276	-0.0763423	-0.124074	-0.110754	0.0301869	0.520004	1.16863	1.18593	0.879588	0.354593	-0.0128338	-0.353614	-0.615049	-0.141594	-0.253314	-0.199397	-0.177956	0.488929	0.395947	0.490352	0.0722458	-0.0379713	0.0727935	2.303	3.28373	0.793023	1.03886	0.61648	0.0087093
2	1	0.221848	-0.274547	-0.687325	-0.25801	-0.225391	-0.275526	1.16842	0.649509	0.607812	-0.0494223	-0.0437714	-0.127187	1.19803	1.42486	0.77918	0.539923	-0.133843	0.360571	2.23735	0.498778	-0.853568	-0.5549	0.0418888	-0.049359	2.20015	1.45052	0.56289	0.165774	0.181566	-0.00201994	0.363216	0.217305	0.744016	0.701665	0.241519	0.0253469
2	1	1.85162	1.28079	1.12325	0.423068	-0.0176058	0.0037723	2.25934	1.47119	1.64436	1.02472	0.513488	0.191696	2.98329	2.23407	3.80262	2.23711	0.871652	0.436394	2.30375	3.32836	1.91288	0.485306	0.0639271	-0.217595	4.86149	4.88111	3.3276	1.35299	1.06914	-0.0413419	5.88403	3.5247	3.52448	2.37941	1.70448	0.612041
2	1	0.0311596	-0.226417	-0.00122382	0.0173878	-0.206393	-0.0745497	1.01466	0.361667	0.210978	0.43737	0.322658	0.153621	2.38667	1.37871	1.46513	0.807654	0.599291	0.0560738	1.51904	0.475157	0.295064	0.0591331	-0.135913	-0.183629	2.15183	1.19713	0.771717	0.468205	0.288595	0.0502556	2.82373	2.40984	1.26107	1.25174	0.912121	0.143069
2	1	0.770719	-0.0298782	-0.277324	0.196668	0.657206	0.0773739	2.44439	0.625327	0.696282	0.404427	0.0377659	-0.0451648	2.70657	2.54696	2.37444	0.657549	-0.231486	-0.250051	0.751137	0.188782	-0.597114	0.113099	0.240895	-0.0122836	2.24011	1.62113	1.10685	0.513789	0.43086	0.345787	2.22788	1.83828	2.22264	0.85094	0.0990137	-0.382863
2	1	1.19083	1.66926	1.05676	0.466245	0.025175	-0.0925486	2.41708	1.80976	1.52253	0.585152	0.225955	0.0930721	3.42613	1.66477	2.41923	1.18428	0.630217	0.208136	2.57071	1.7068	1.10973	0.613174	0.178757	0.0821169	2.71846	3.79849	1.38275	0.814246	0.683525	0.650262	2.89417	3.5722	3.05412	1.69184	1.15382	0.699118
2	1	0.235577	-0.375506	-0.367182	-0.12023	-0.056537	-0.070435	1.57928	0.518499	0.558351	0.119619	0.0277199	0.0570383	1.57707	1.45183	1.02067	0.222949	-0.277079	-0.0366015	1.19211	0.883951	0.190117	0.217243	0.0880333	-0.149215	1.40408	1.22917	0.863095	0.26189	0.0112032	-0.232527	1.21414	2.24061	1.13557	0.588009	0.356066	0.162209
2	1	-0.154355	0.317977	0.884252	0.211199	0.122885	0.0163348	0.857459	0.861918	0.597881	0.184708	0.135357	0.185737	1.22445	0.983631	0.98399	0.593896	0.098994	-0.157726	0.0842369	0.10514	0.224894	0.210423	0.192885	0.0698002	1.23533	0.339342	0.399141	0.434573	0.397594	0.233089	1.72623	1.25263	1.388	1.03035	0.941764	0.347464
2	1	0.185569	-0.0423983	-0.344847	-0.188367	-0.112204	-0.171797	0.785745	0.476104	-0.295305	-0.120327	-0.315902	-0.331032	1.37766	0.897603	0.208107	0.0573984	-0.276709	-0.341927	1.38498	0.0243698	-0.0829727	-0.0289876	0.126234	-0.120603	2.79667	0.540418	0.466855	0.164714	0.114777	-0.00309454	0.863157	1.02147	1.46884	0.746863	0.104766	-0.255581
2	1	3.10247	1.51588	0.382603	-0.828929	-0.0875215	0.0405596	3.38725	2.39283	1.34463	-0.284619	-0.043076	0.167022	2.04285	2.46458	1.69137	2.26102	0.601011	0.431896	2.59055	3.46243	0.887615	-0.272132	-0.157971	0.24838	3.82115	3.05704	1.75308	0.83688	-0.122433	0.143867	3.02018	2.03916	2.0292	2.49218	1.58818	0.836512
2	1	0.877581	1.16209	0.293088	0.150987	-0.243399	0.0640286	1.30485	1.15542	1.01261	0.394039	-0.189271	-0.0162526	1.64256	1.3274	1.29927	1.80178	0.292483	0.0661676	2.26156	1.48378	0.410253	0.0979346	-0.0261739	0.0243088	2.2483	1.66841	1.33992	0.779579	0.249083	0.107343	2.86958	2.13546	2.0334	1.04409	0.699326	0.315091
2	1	0.206584	0.0663858	0.227035	0.0434376	-0.0143416	-0.0797348	1.09638	0.790604	0.318345	0.15144	0.0534103	0.0954215	0.899495	1.06564	1.13458	0.484878	-0.540651	-0.186039	0.893505	1.09364	0.443921	0.0488025	-0.00746368	-0.0980622	1.43087	1.26417	0.617497	0.20602	0.167471	-0.0307753	1.71585	1.17459	0.998604	0.586592	0.552457	0.112151
2	1	1.2833	0.620043	0.221647	-0.0177324	-0.110688	-0.13061	0.899539	1.19845	1.31243	0.496401	-0.15898	0.0267924	1.50502	0.993393	0.659489	0.466099	0.218383	-0.0519546	0.915522	0.765268	0.180489	-0.0519595	-0.0470535	0.00857906	1.36878	1.39138	1.93681	0.489836	0.206492	0.0879915	3.54038	3.99895	3.6379	1.21849	0.794744	0.162455
2	1	0.0221581	-0.543178	-0.823249	-0.372583	-0.152072	-0.126163	0.979588	0.0146716	-0.0593062	0.146985	0.0860758	-0.113864	1.03281	0.568261	0.420581	0.358008	0.254531	-0.00647488	-0.0185777	0.00512627	0.0710907	0.0559833	0.0823992	-0.12798	1.5659	0.638062	0.420703	0.572127	0.387792	0.129357	0.971114	1.04741	0.894265	0.872392	0.284351	0.078212
2	1	1.21772	0.426591	-0.0705201	-0.126615	0.0552861	0.11444	1.71793	1.21578	0.612496	0.14728	0.135642	0.163729	1.16383	1.4026	1.37228	0.746721	0.39272	-0.0504419	0.946388	0.751201	0.287907	0.120539	0.00407787	0.0850653	2.42538	0.800491	0.286104	0.131587	0.194235	0.0491103	1.51287	1.07397	1.19901	1.56892	0.793892	-0.0954548
2	1	1.08033	0.0628208	-0.229475	0.0520458	0.289824	0.171934	3.27063	3.53328	2.40171	0.617028	0.309051	0.0621461	3.82985	1.52016	1.30279	0.662639	0.029931	-0.0928109	4.27877	2.22482	0.389424	0.0436735	-0.0960777	-0.0130666	3.68032	1.97687	1.1116	0.757107	0.139636	0.318257	2.45016	2.20353	2.61951	1.38745	0.855093	0.673043
2	1	0.873706	0.384538	0.391478	0.43222	0.625528	-0.107348	1.71492	1.36467	1.70565	0.396851	0.045172	-0.0219285	2.84749	1.81459	2.01594	1.22438	0.422248	0.202133	0.831672	1.87146	1.16879	0.887024	0.376749	-0.269447	2.78541	1.06676	1.05269	0.820999	0.226845	-0.191377	3.08717	2.25191	2.69492	1.69123	0.604754	0.233007
2	2	1.00388	0.861146	0.723019	0.171904	-0.108653	-0.0353073	1.55001	1.61713	1.24712	0.712212	0.494439	0.0737442	1.4068	1.19982	1.10765	1.28702	1.3376	0.537724	0.755496	0.868573	1.03771	0.274869	0.00504858	-0.130268	3.1389	2.25166	3.33118	1.13517	0.400648	0.168594	2.7616	3.28319	5.53701	2.22824	2.63132	0.627947
2	2	1.94345	1.28256	0.210376	-0.0479901	-0.0359726	-0.0800757	1.94535	1.94365	0.774407	0.497653	0.277196	0.203859	1.99199	1.39388	1.05754	1.53155	0.928214	0.356005	1.27654	0.971068	0.952891	0.469334	-0.0603932	-0.140942	2.71722	1.31743	0.833956	0.669386	0.544478	0.251728	4.91925	3.23672	1.44522	1.33639	0.964552	0.502395
2	2	0.0445331	-0.251306	-0.422046	-0.52287	-0.220501	-0.25877	0.407673	0.31056	-0.0266294	-0.124389	-0.0235856	-0.25832	0.606701	0.298725	0.249926	0.0990036	-0.107389	-0.288051	-0.0780377	-0.0392219	0.0536264	-0.148095	-0.198898	-0.26691	0.767785	0.580554	0.317278	-0.0868095	0.108678	0.126975	0.757399	0.44697	0.492816	0.529997	0.28987	-0.112664
2	2	-0.12947	-0.279164	0.00096209	-0.173172	-0.128486	-0.143294	0.00579921	-0.124516	0.13035	-0.0535407	-0.290912	-0.141497	0.0174202	0.0161701	0.383152	0.15449	-0.0656717	0.203698	0.495094	0.0800407	0.0743969	-0.458431	-0.203601	-0.0847121	0.244958	0.114448	0.125943	0.00771906	-0.0363454	0.0689433	0.36058	0.314761	0.228387	0.226502	-0.0260962	0.102272
2	2	0.426195	0.0855308	-0.216955	-0.125988	-0.0324394	-0.0812003	3.82181	0.961678	0.409487	0.323041	0.0702892	0.0779514	2.43376	0.856429	1.1618	1.04006	0.963646	0.301746	0.176085	-0.140342	0.273667	0.0830562	-0.23434	-0.153118	1.93827	1.80917	1.25205	0.640941	0.165075	0.0258642	2.65102	2.09952	1.78302	1.31761	0.518822	0.294847
2	2	1.03331	1.13931	0.705539	0.311507	-0.140872	-0.181401	2.55986	2.56224	0.944774	0.561246	0.0997124	0.289466	3.34271	1.73546	1.13471	1.29405	0.158315	-0.249392	2.60938	2.63588	1.47631	0.485013	0.0785843	-0.117982	3.15178	2.48023	2.5667	1.08389	0.194814	-0.0996005	2.87408	2.50478	2.40003	1.44968	0.758275	-0.346203
2	2	0.915808	0.281916	0.157823	-0.0408193	-0.179793	-0.0104378	1.91927	0.852311	0.455281	0.164748	-0.106084	-0.116684	2.53866	1.16512	1.13284	0.743882	0.0711002	0.0794446	2.39401	1.56758	0.267687	0.145178	-0.0136885	-0.0940197	2.52652	1.22286	0.7992	0.509671	0.173528	0.0520588	2.97303	2.09966	1.36671	1.29786	0.526959	0.108572
2	2	0.343431	0.140663	-0.112977	-0.278092	-0.0810183	0.035871	0.877296	0.229818	0.129882	0.00487425	0.207457	0.12092	1.55072	0.00279243	0.891219	0.747479	0.475497	0.299621	-0.172997	0.0268815	-0.242271	-0.398671	-0.0855417	-0.0254558	0.329374	0.508036	0.678502	0.396699	0.354379	0.264884	2.10379	1.59962	1.37297	0.531587	0.324186	0.401698
2	2	0.709113	0.63703	0.141619	-0.180215	-0.177333	-0.093488	1.38232	1.22827	0.5581	0.306382	-0.0349358	-0.0788583	1.92892	1.8258	1.21505	0.904224	-0.0443572	-0.43846	2.26348	1.23452	0.607482	-0.34891	-0.370729	-0.234864	2.50367	1.77112	1.46747	0.456334	0.148456	-0.0341571	4.46395	1.32827	1.97044	1.30431	0.501744	0.0490668
2	2	2.10724	1.05662	0.45988	-0.00588122	-0.219215	-0.0794961	4.17082	1.45658	1.21508	0.804858	0.61563	0.398512	2.77952	3.35896	2.6199	1.54762	0.825235	0.744916	1.39443	2.00721	0.707643	0.0166784	-0.391063	-0.197464	3.16727	3.01649	1.72248	0.754567	0.165916	0.231154	6.01688	2.10554	1.91589	1.43227	1.31471	0.291533
2	2	0.513798	0.0713999	-0.247625	-0.396716	-0.729566	-0.293226	0.695512	0.401982	0.0807541	-0.222647	-0.245905	0.000732547	0.437417	0.268532	0.209965	0.253301	0.204233	-0.0900092	0.303464	-0.070943	-0.507688	-0.521674	-0.296586	-0.086711	0.702778	0.31263	0.128892	-0.179316	-0.178119	0.265211	0.783297	-0.0392137	0.220233	0.358506	-0.0678118	-0.122501
2	2	2.3733	0.823045	0.410044	0.100111	0.215435	0.00169176	1.67556	0.89798	0.818018	0.627283	0.226141	0.117645	1.16184	1.17852	1.49745	1.37453	0.815507	0.580301	3.58781	2.70889	1.23117	0.437762	0.160164	-0.00728101	3.73426	1.71743	1.71239	0.985696	0.468156	0.284959	3.62744	1.73278	1.6014	1.67	1.07717	0.60613
2	2	1.27059	0.779242	0.598553	0.419885	0.115985	0.124171	1.48084	1.21682	1.08749	0.6804	0.330175	0.0600234	3.10158	2.0201	1.36676	1.09395	0.449062	0.163178	0.987485	0.945645	0.539371	0.102109	-0.0945987	-0.0370865	2.50394	0.974959	1.09619	0.351831	0.0596414	0.122394	2.1844	1.5939	1.70263	1.18161	0.696874	0.400407
2	2	0.369524	0.174315	0.433973	0.10038	-0.0847673	-0.0950515	1.21688	0.96625	0.754592	0.279761	0.0816465	0.0180939	1.54882	1.20664	1.29443	0.73728	0.243372	0.0528745	1.03976	0.762491	0.435207	0.286122	-0.0522059	-0.009559	1.44486	1.2344	0.394268	0.618962	0.118477	-0.0282646	1.9856	1.26007	0.544594	0.891532	0.74393	0.0335163
2	2	1.20998	0.887493	0.571842	0.302923	-0.0434028	0.0314759	2.89295	2.16304	0.765825	0.701397	0.447166	0.0849914	2.7879	2.3173	1.6129	1.39834	1.22768	0.568828	1.25414	1.01929	1.09839	0.395287	-0.128644	-0.220647	1.25678	2.57319	1.95391	0.658411	0.225621	0.149164	2.42285	2.70647	2.40199	1.64306	1.06085	0.52957
2	2	1.44125	0.483439	0.0160585	-0.0663234	0.0558599	0.0613427	0.851414	0.715707	0.408014	0.254145	0.0831052	0.138243	-0.0462431	0.525657	1.19859	1.35322	0.65651	0.0339088	0.498891	0.303889	0.358872	0.0797288	-0.0717018	-0.0322084	1.67808	0.425923	0.620276	0.35871	0.377082	0.17251	1.84011	0.944634	1.1109	1.31511	0.962995	0.225997
2	2	0.155317	-0.448941	-0.107059	0.0868599	0.0185276	-0.0149532	1.94965	0.672512	0.442693	0.340278	0.406546	0.218229	2.87266	0.983638	1.49056	0.831793	0.465317	0.174878	0.59244	0.898631	0.424411	0.287292	0.0858858	0.107565	1.70976	1.86099	2.0081	0.407172	0.0712389	0.060445	3.09501	4.23091	2.18678	0.913514	0.515054	0.285942
2	2	2.30553	0.48862	0.0894892	-0.258201	0.0228934	0.00900575	3.02027	1.86454	1.4723	0.265707	0.31852	0.210594	1.45781	2.32945	1.47855	0.908888	0.114745	0.0661825	2.026	0.608922	-0.0541916	-0.286379	-0.0855119	-0.00477107	1.72993	1.67409	0.857765	0.512859	0.310416	0.145303	1.74892	2.21951	0.848384	0.510412	0.257438	0.296161
2	2	0.228302	-0.00551134	-0.0736672	0.0232203	0.153444	-0.0561886	1.17376	0.436764	0.516692	0.389637	0.15189	-0.0566443	1.24571	1.00405	0.951738	0.814268	-0.0280314	0.0561086	0.449921	0.43311	0.6486	0.140992	-0.23688	-0.145528	1.3055	0.901832	0.526397	0.350026	-0.0392235	-0.160635	1.45533	0.7498	0.723072	0.753112	0.363923	0.0471986
2	2	2.06941	1.55944	1.24505	0.864535	0.227281	0.118935	2.25883	2.14559	0.99675	0.568843	0.350196	0.211266	3.08158	2.70327	2.10429	1.87653	0.950824	0.79607	5.42754	4.0122	1.72535	0.499235	-0.0851494	0.055035	2.87407	1.76704	1.73733	0.84917	0.951647	0.484976	3.07685	2.06863	3.10179	1.58347	1.36262	0.388435
2	2	0.64798	0.627275	0.315525	-0.0672821	-0.222455	-0.117023	1.07433	0.903798	0.517134	0.136031	-0.0538926	0.0274103	1.73616	1.47157	0.980891	0.703849	0.388918	0.0424887	0.533616	0.464075	-0.106701	-0.0882266	-0.052148	-0.107027	1.05561	0.636206	0.570513	0.203497	0.127012	0.117206	1.76704	0.951782	1.31966	1.4318	0.425818	-0.0388271
2	2	1.50408	1.33595	0.464498	-0.115393	-0.0571047	-0.0768204	2.45016	2.64628	0.718742	0.147382	-0.0247254	0.0270366	4.01434	2.27729	1.64751	1.41291	0.431385	0.0477764	1.69484	0.932277	0.633299	0.229323	-0.0163053	-0.205192	2.18104	1.6145	1.06447	0.744552	0.336392	0.127718	4.11915	3.15512	1.94138	2.1498	1.55434	0.446408
2	2	0.0141749	0.367764	0.145707	-0.095456	-0.120083	0.15793	1.16492	0.785805	0.427697	0.103085	0.0686427	0.157424	1.95827	1.03651	1.18984	0.88691	0.47063	0.100811	1.31846	0.423049	0.173289	0.0932555	0.00831933	0.0635886	2.45323	1.6382	0.732384	0.137007	0.0155678	-0.0823848	2.92437	2.05543	1.52564	0.883539	0.725713	0.516532
2	2	2.42984	0.388532	-0.0324146	-0.0137173	-0.301649	-0.160588	0.642962	0.551709	0.42662	0.358742	-0.0617632	0.00438262	0.69794	1.19221	1.02968	0.295503	-0.00349812	0.0374116	1.08269	1.25575	0.438077	0.134338	-0.0109566	-0.0849145	1.40889	1.87354	0.83872	0.460193	0.107118	0.101448	2.85071	1.68792	0.895526	1.09334	0.537618	0.154474
