# Supplementary material for: A universal reading network and its modulation by writing system and reading ability in French and Chinese children
Source: eLife. 2020 Oct 29;9:e54591. doi: 10.7554/eLife.54591 (PMC7669264; doi:10.7554/eLife.54591)
Supplement: Table 1—source data 1. [file elife-54591-table1-data1.xlsx]

## Sheet: Feuil1
Language	dyslexia	Age (months)	sex (0:Female; 1: Male)
1	1	129	0
1	1	113	0
1	1	124	0
1	1	131	0
1	1	135	0
1	1	125	1
1	1	135	1
1	1	109	1
1	1	104	1
1	1	135	1
1	1	105	0
1	1	131	0
1	1	121	0
1	1	129	1
1	1	144	1
1	1	123	1
1	1	116	0
1	1	113	1
1	1	112	1
1	1	113	1
1	1	123	0
1	1	125	1
1	1	131	1
1	1	114	0
1	2	106	1
1	2	109	0
1	2	104	0
1	2	130	1
1	2	130	1
1	2	118	1
1	2	138	0
1	2	135	1
1	2	135	1
1	2	116	1
1	2	125	0
1	2	118	1
1	2	121	1
1	2	121	1
1	2	129	1
1	2	120	0
1	2	131	1
1	2	123	1
1	2	117	1
1	2	130	1
1	2	112	0
1	2	125	1
1	2	138	0
1	2	110	0
2	1	117	1
2	1	116	1
2	1	135	0
2	1	118	0
2	1	112	1
2	1	117	1
2	1	117	1
2	1	122	0
2	1	136	0
2	1	119	1
2	1	129	1
2	1	143	1
2	1	111	0
2	1	117	1
2	1	118	0
2	1	113	1
2	1	141	0
2	1	130	0
2	1	118	0
2	1	110	1
2	1	114	1
2	1	113	0
2	1	134	1
2	1	141	0
2	2	125	1
2	2	114	0
2	2	122	0
2	2	124	1
2	2	114	1
2	2	134	0
2	2	120	0
2	2	125	1
2	2	123	0
2	2	137	0
2	2	128	1
2	2	111	1
2	2	109	1
2	2	114	0
2	2	125	1
2	2	122	1
2	2	124	1
2	2	124	1
2	2	121	1
2	2	156	0
2	2	111	1
2	2	126	1
2	2	121	1
2	2	111	1
